# Supplementary material for: Hypoxia-induced proteasomal degradation of DBC1 by SIAH2 in breast cancer progression
Source: eLife journal article supplement (doi:10.7554/elife.81247), 2022-08-01
Supplement: supp [file elife_poa_e81247_Figure_1_figure_supplement1_source_data_1.pdf › elife_poa_e81247_Figure_1_figure_supplement1_source_data_1.pdf]

**Figure 1-figure supplement 1. The stability of DBC1 was regulated under hypoxic conditions.**

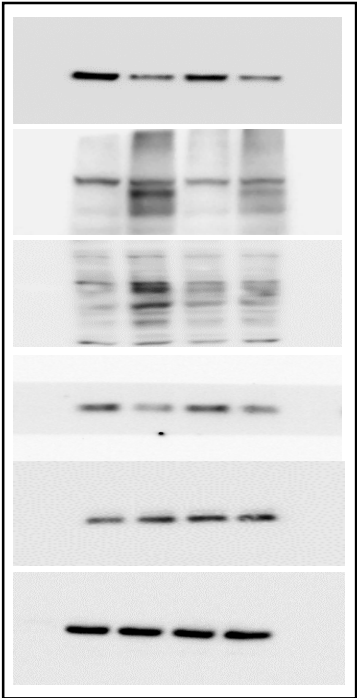

Figure S1A

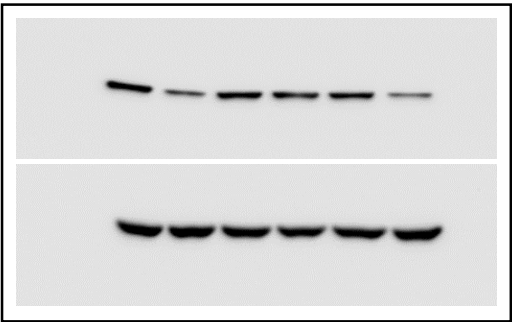

Figure S1B

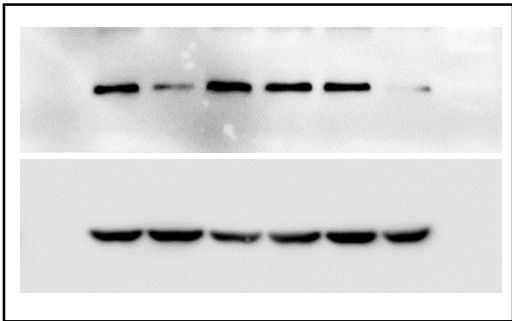

Figure S1C

**Figure 1-figure supplement 1. The stability of DBC1 was regulated under hypoxic conditions.**

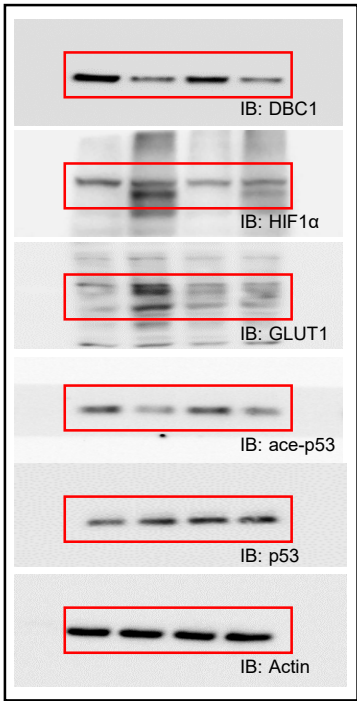

Figure S1A

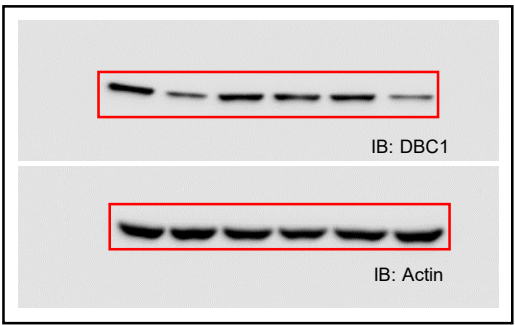

Figure S1B

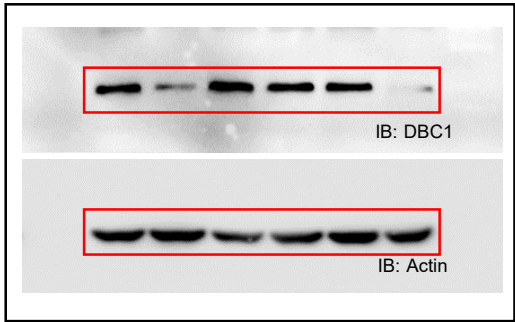

Figure S1C
