# Supplementary material for: Hypoxia-induced proteasomal degradation of DBC1 by SIAH2 in breast cancer progression
Source: eLife journal article supplement (doi:10.7554/elife.81247), 2022-08-01
Supplement: supp [file elife_poa_e81247_Figure_1_figure_supplement_1.pdf › elife_poa_e81247_Figure_1_figure_supplement_1.pdf]

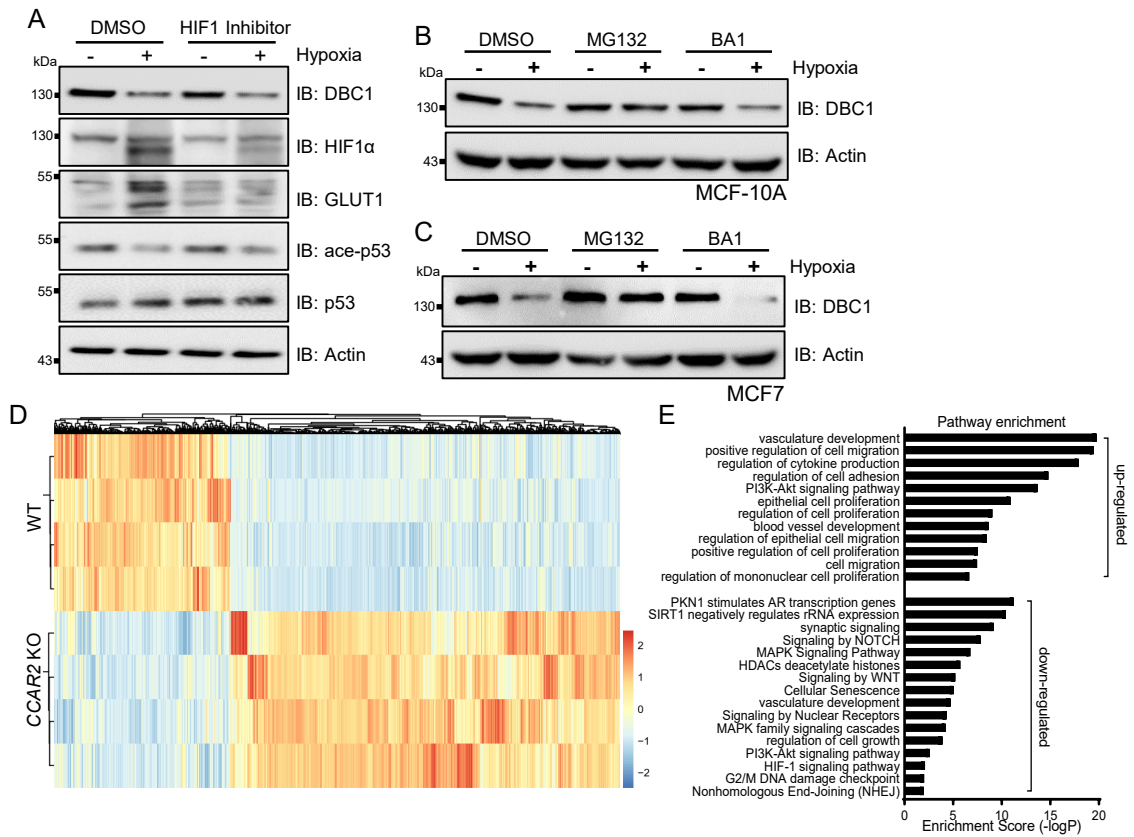

**Figure 1-figure supplement 1. The stability of DBC1 was regulated under hypoxic conditions.**

(A) MDA-MB-231 cells were exposed to normoxia or hypoxia for 24h, with or without HIF1 Inhibitor (10  $\mu$ M) for 12 h, and then DBC1 and indicated proteins were detected by Western blotting. (B-C) MCF10A and MCF7 cells were exposed to normoxia or hypoxia for 24 h, with or without proteasomal inhibitor MG132 (10  $\mu$ M) and lysosomal inhibitor BA1 (20 nM), and then protein level of DBC1 was detected by Western blotting. (D) Heatmap of the differentially expressed genes in wild-type and *DBC1* knockout MDA-MB-231 cells. (E) Pathway enrichment in *DBC1* knockout MDA-MB-231 cells by Metascape.
