# Supplementary material for: Hypoxia-induced proteasomal degradation of DBC1 by SIAH2 in breast cancer progression
Source: eLife journal article supplement (doi:10.7554/elife.81247), 2022-08-01
Supplement: supp [file elife_poa_e81247_Figure_1_source_data_1.pdf › elife_poa_e81247_Figure_1_source_data_1.pdf]

Figure 1. Hypoxia induces DBC1 degradation.

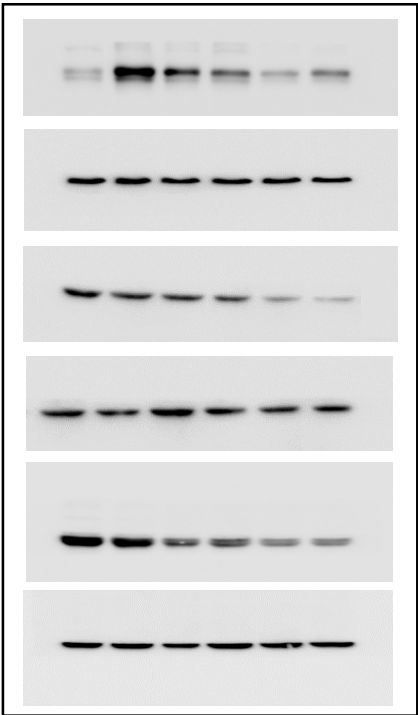

Figure 1C

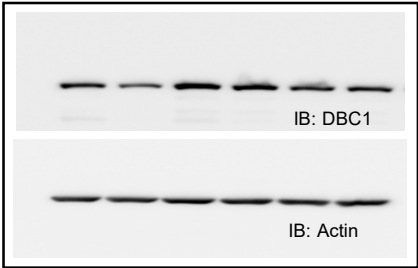

Figure 1E

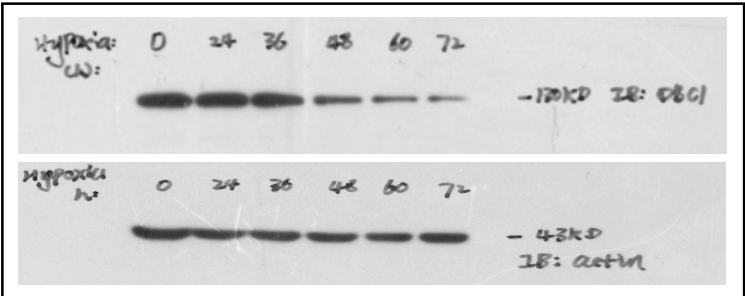

Figure 1D

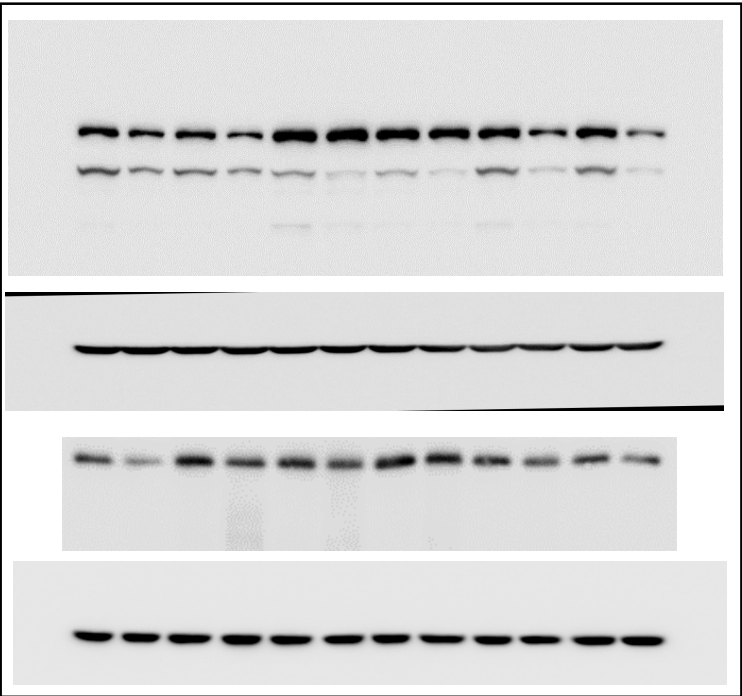

Figure 1F

Figure 1. Hypoxia induces DBC1 degradation.

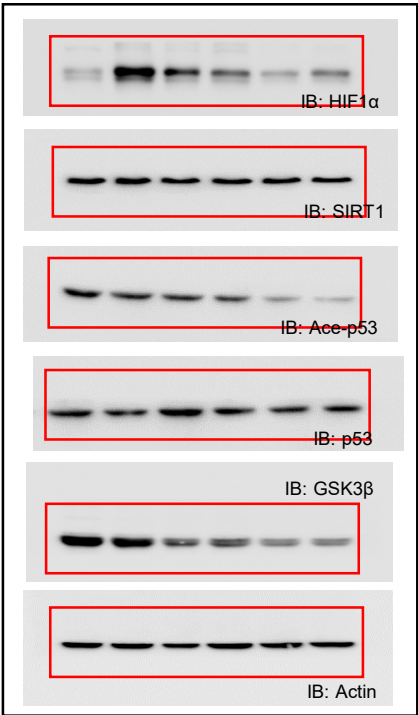

Figure 1C

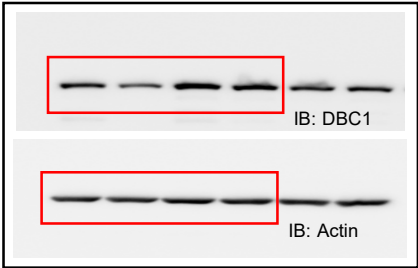

Figure 1E

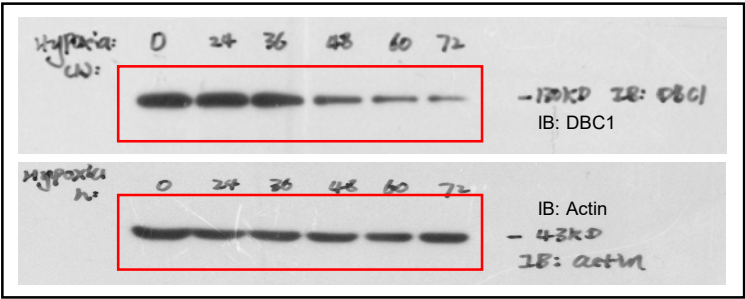

Figure 1D

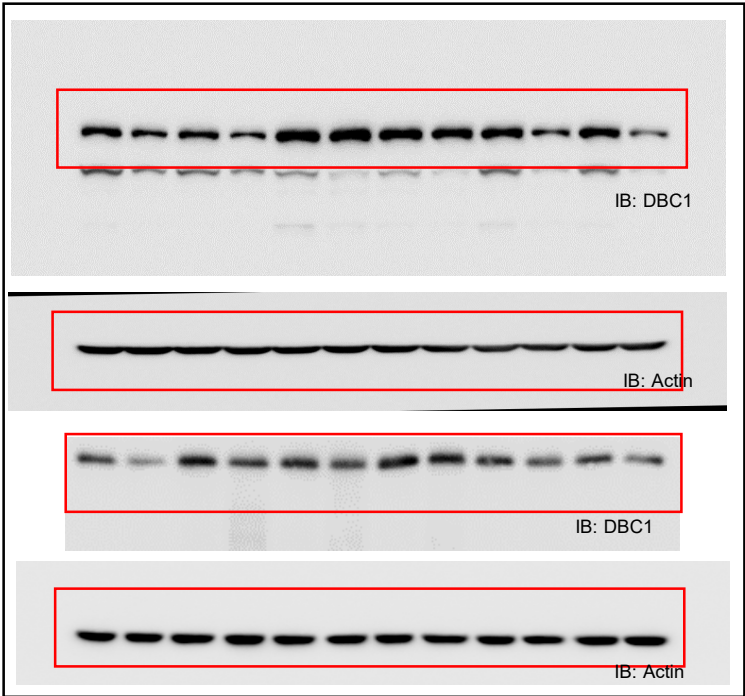

Figure 1F
