# Supplementary material for: Hypoxia-induced proteasomal degradation of DBC1 by SIAH2 in breast cancer progression
Source: eLife journal article supplement (doi:10.7554/elife.81247), 2022-08-01
Supplement: supp [file elife_poa_e81247_Figure_2_figure_supplement1_source_data_1.pdf › elife_poa_e81247_Figure_2_figure_supplement1_source_data_1.pdf]

Figure 2-figure supplement 1. The stability of DBC1 was regulated by SIAH2.

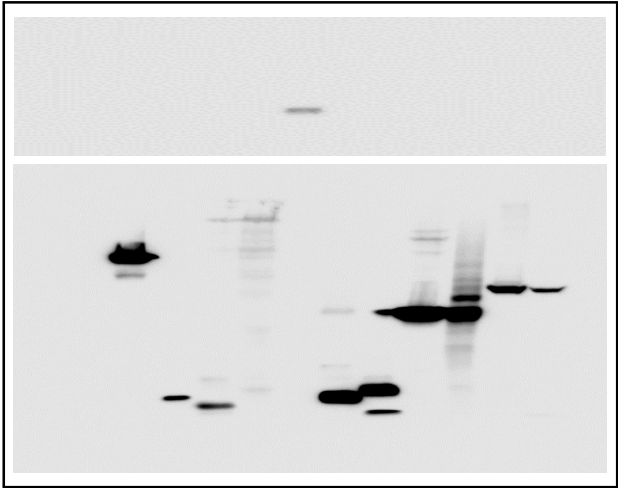

Figure S2A

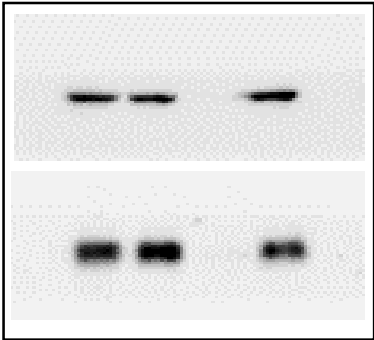

Figure S2B

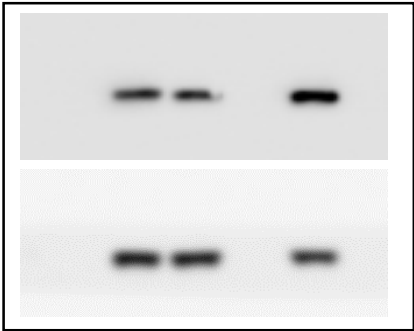

Figure S2C

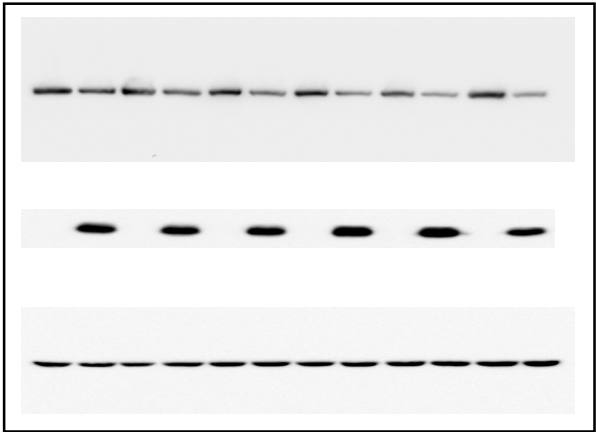

Figure S2G

Figure 2-figure supplement 1. The stability of DBC1 was regulated by SIAH2.

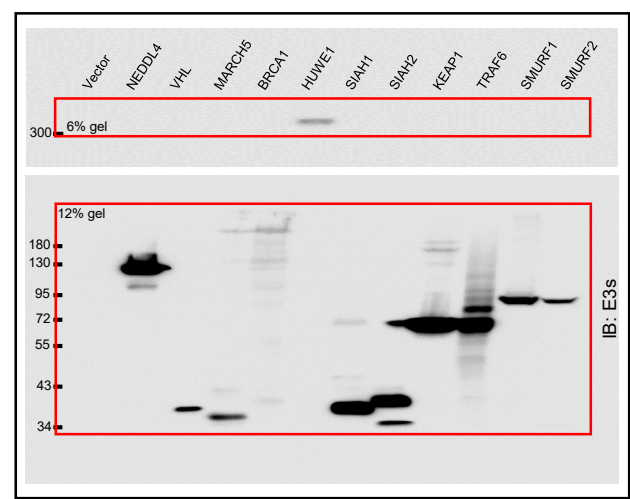

Figure S2A

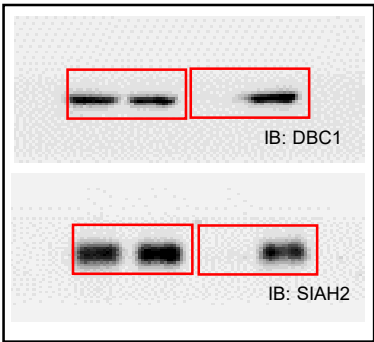

Figure S2B

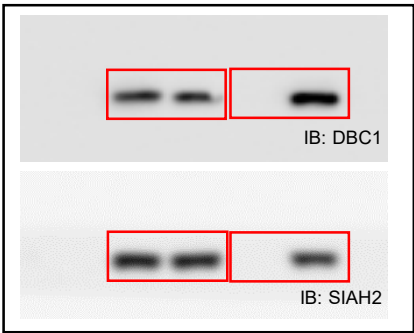

Figure S2C

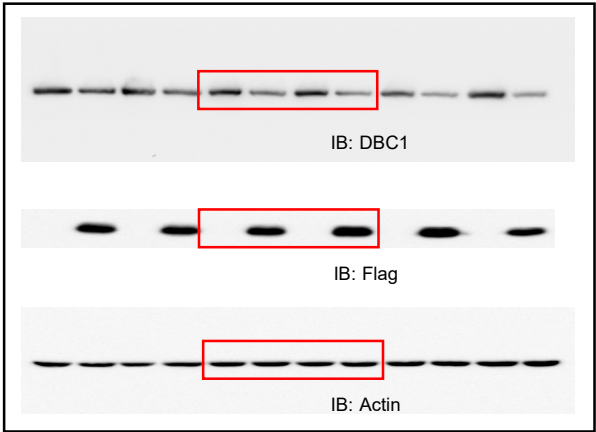

Figure S2G
