# Supplementary material for: Hypoxia-induced proteasomal degradation of DBC1 by SIAH2 in breast cancer progression
Source: eLife journal article supplement (doi:10.7554/elife.81247), 2022-08-01
Supplement: supp [file elife_poa_e81247_Figure_2_figure_supplement_1.pdf › elife_poa_e81247_Figure_2_figure_supplement_1.pdf]

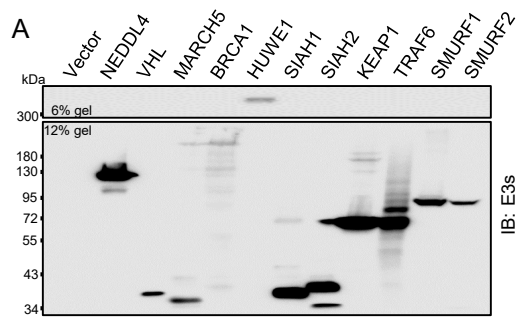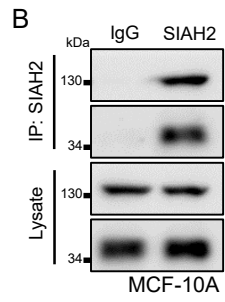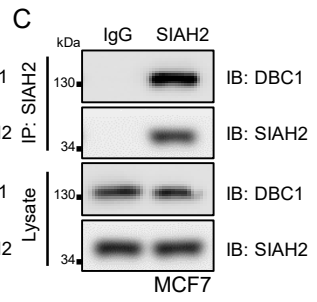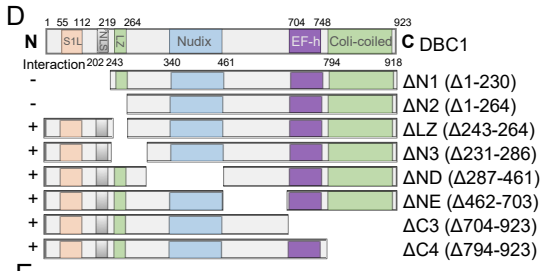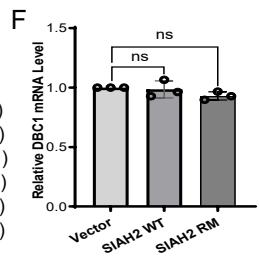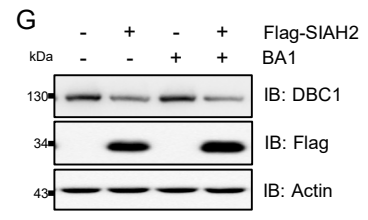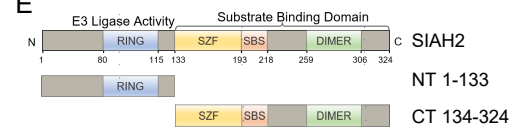

### **Figure 2-figure supplement 1. The stability of DBC1 was regulated by SIAH2.**

(A) HeLa cells were transfected with several hypoxia-relative E3 ligases and cultured for 24 h. The proteins level of E3 ligases were detected by Western blotting. (B-C) MCF10A and MCF7 cells were cultured under normoxia or hypoxia for 18 h, then treated with 10  $\mu$ M MG132 and incubated under normoxia or hypoxia for another 6 h. Endogenous interactions between DBC1 and SIAH2 were analyzed by Co-IP. (D-E) Truncated forms of Myc-DBC1 and Flag-SIAH2<sup>RM</sup> were constructed based on its functional domains. (F) Quantitative Real-time PCR analysis of the DBC1 mRNA level in HeLa cells, data are the mean  $\pm$  SEM of three experiments, Student's t-test, ns means not significant. (G) Western blotting analysis of the DBC1 level in HeLa cells expressing Flag-SIAH2 and treated with or without the lysosomal inhibitor BA1 (20 nM).
