# Supplementary material for: Hypoxia-induced proteasomal degradation of DBC1 by SIAH2 in breast cancer progression
Source: eLife journal article supplement (doi:10.7554/elife.81247), 2022-08-01

Figure 2. SIAH2 interacts with DBC1 and regulates its stability.

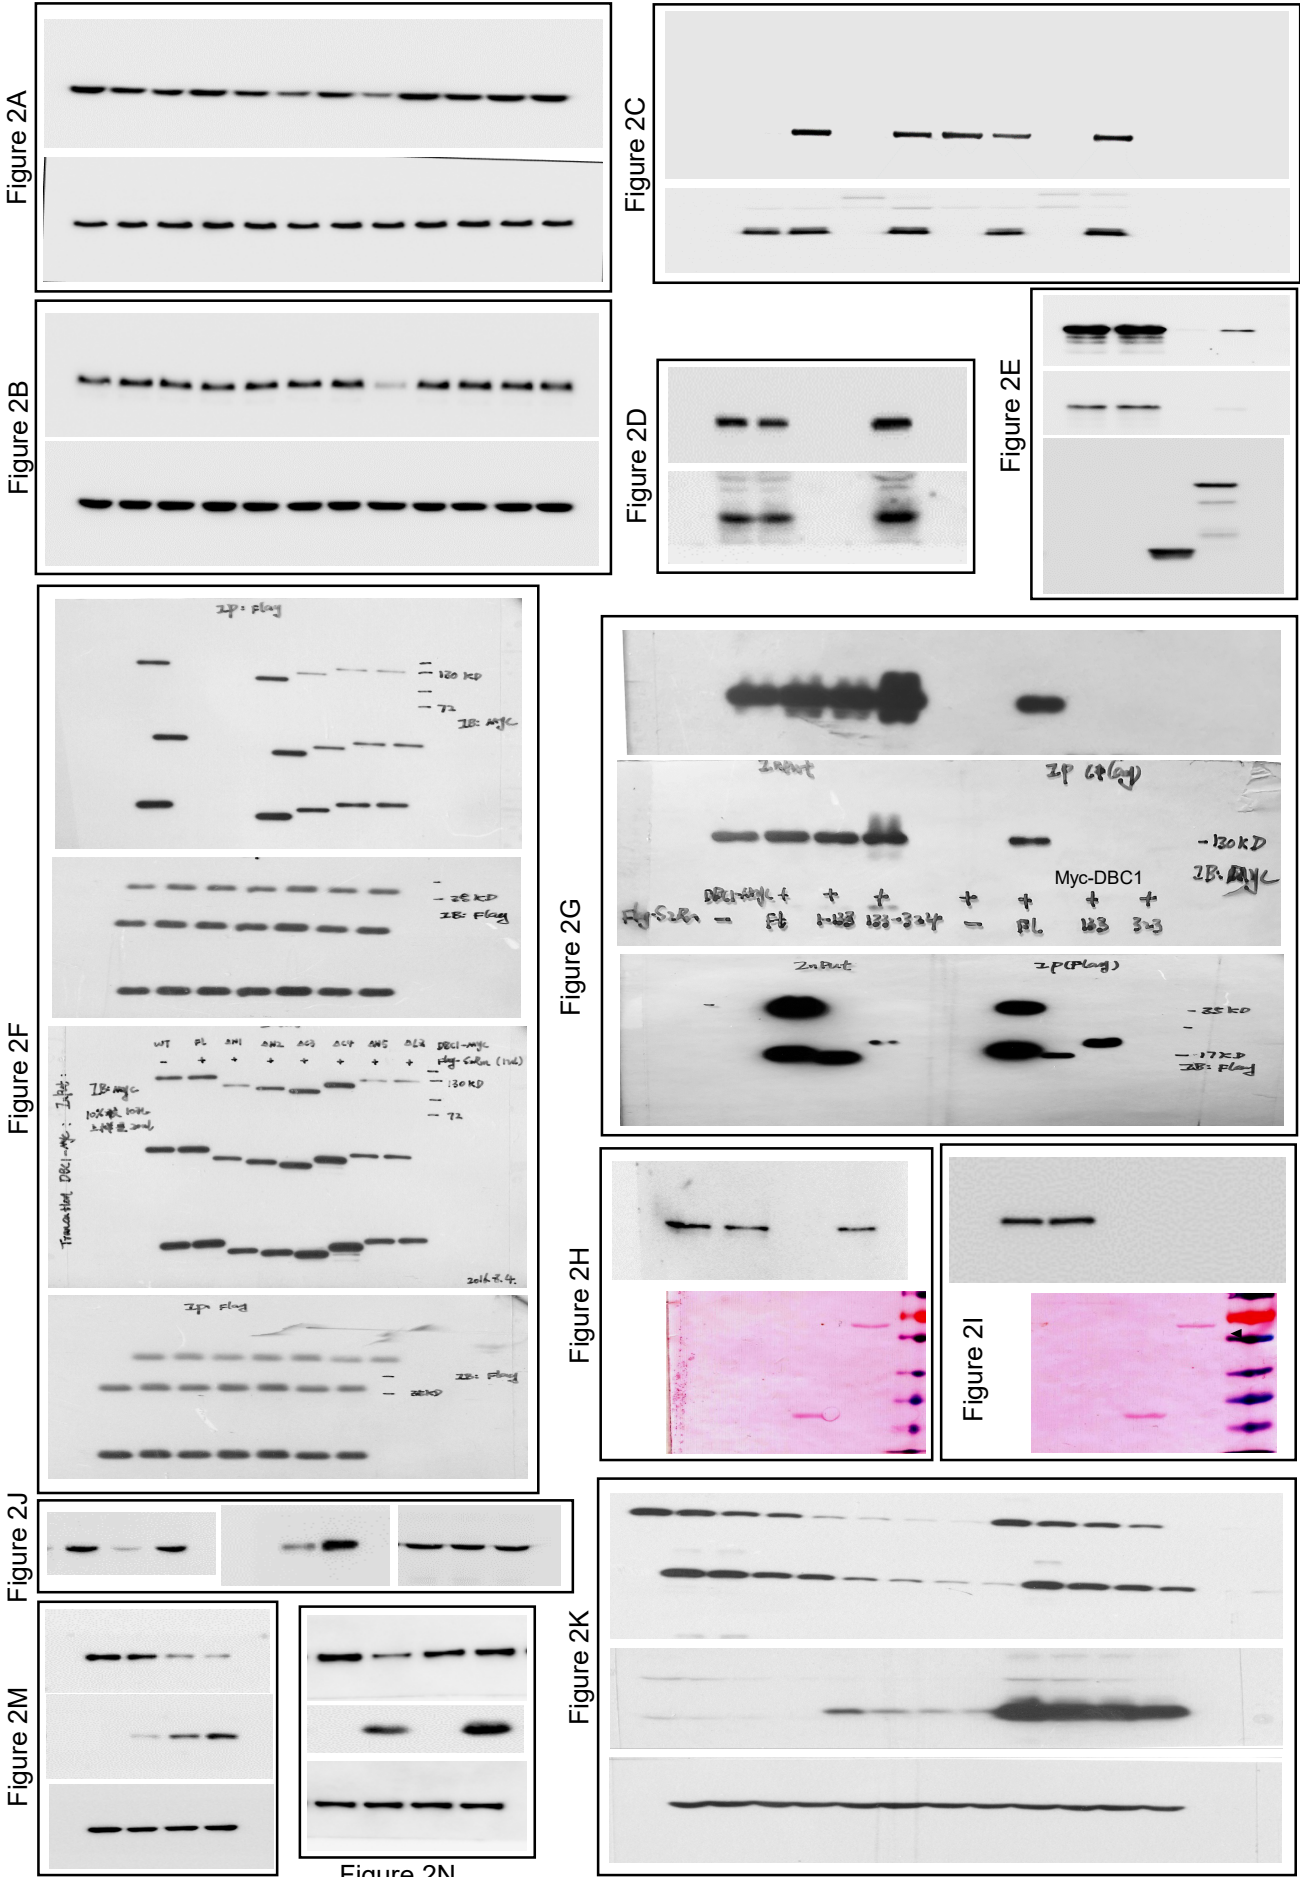

Figure 2. SIAH2 interacts with DBC1 and regulates its stability.

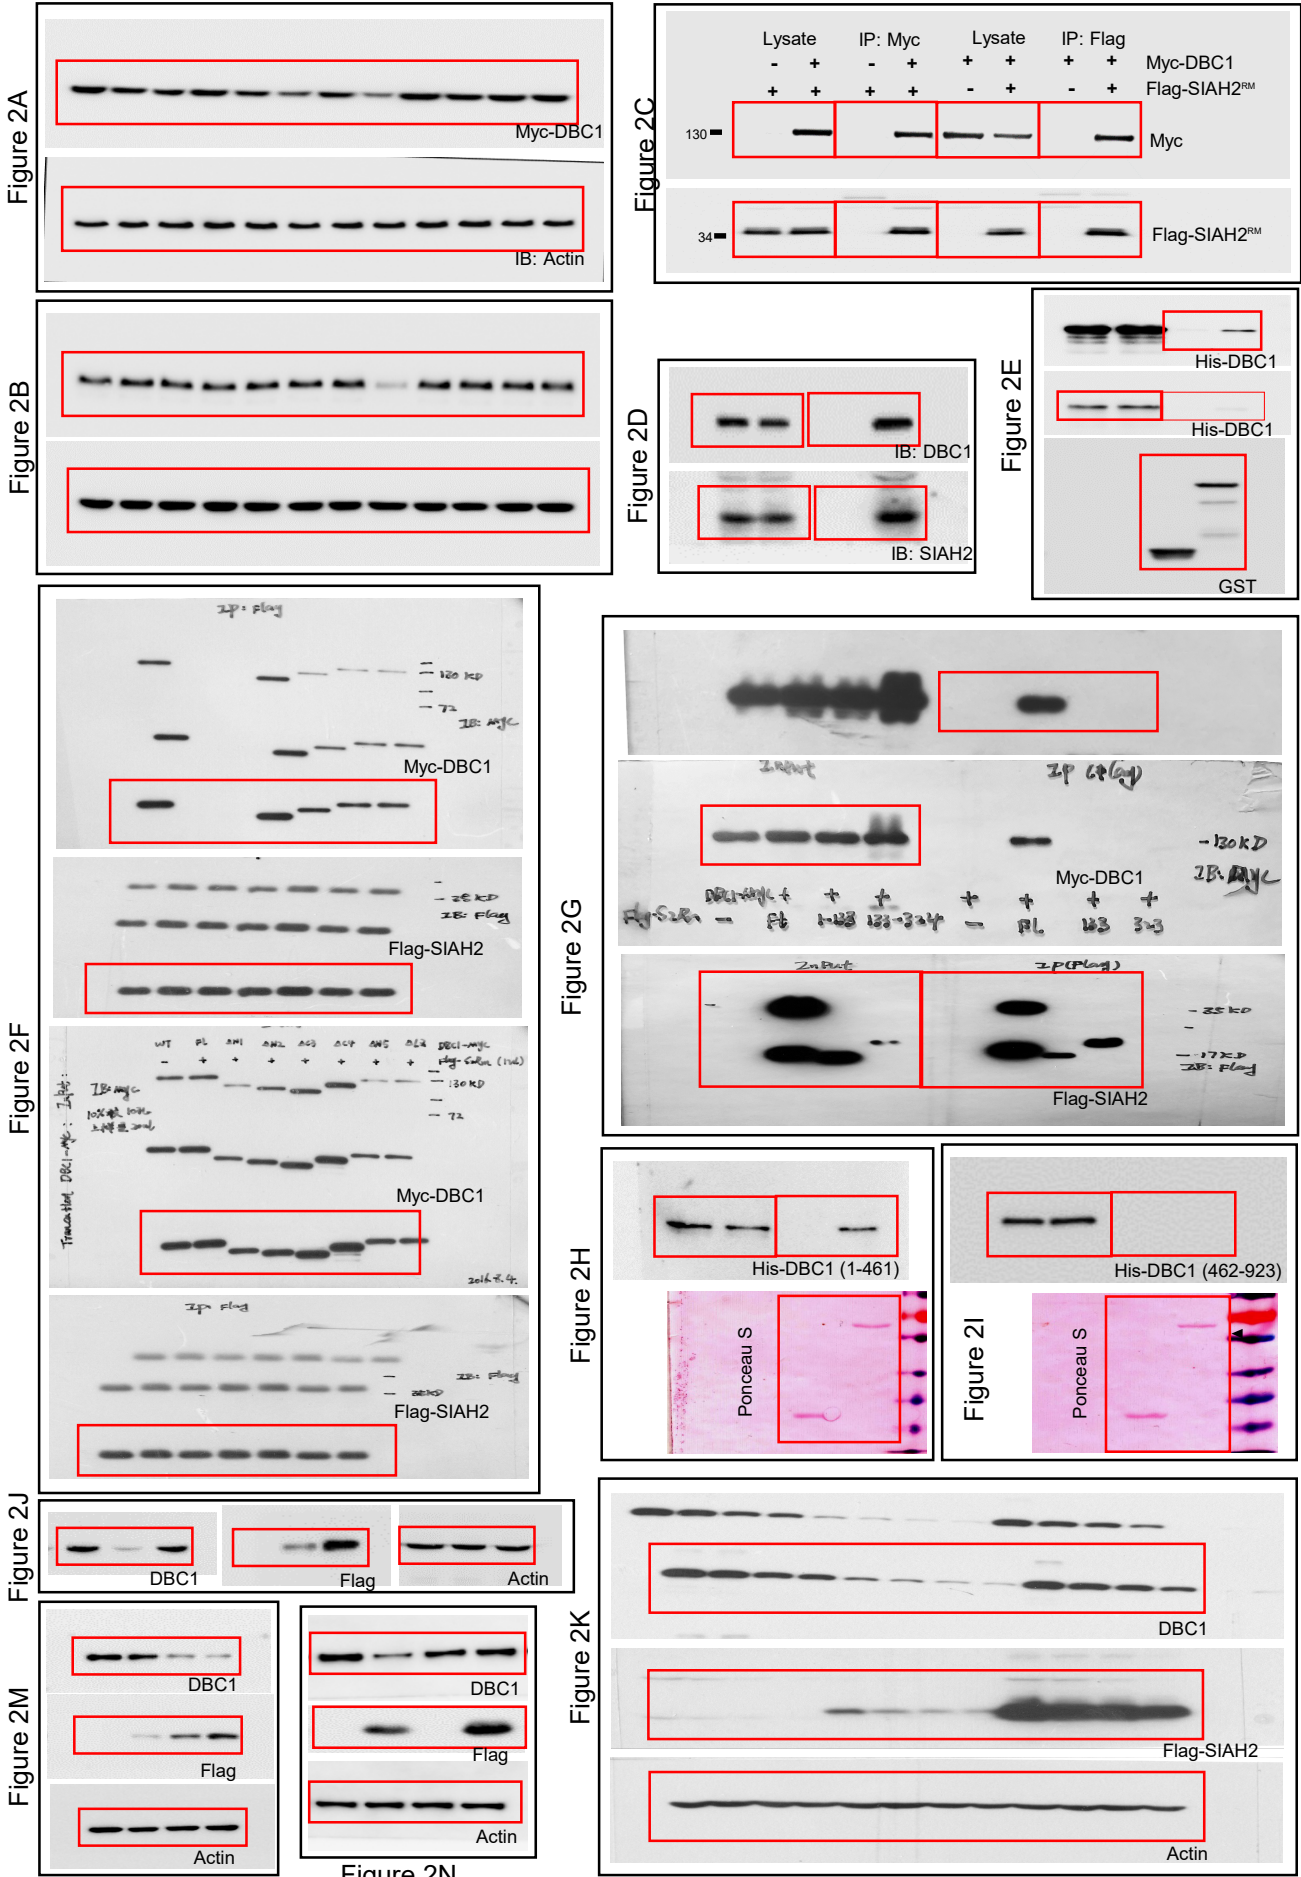

Supplement: supp [file elife_poa_e81247_Figure_2_source_data_1.pdf › elife_poa_e81247_Figure_2_source_data_1.pdf]
