# Supplementary material for: Hypoxia-induced proteasomal degradation of DBC1 by SIAH2 in breast cancer progression
Source: eLife journal article supplement (doi:10.7554/elife.81247), 2022-08-01
Supplement: supp [file elife_poa_e81247_Figure_3_figure_supplement1_source_data_1.pdf › elife_poa_e81247_Figure_3_figure_supplement1_source_data_1.pdf]

Figure 3-figure supplement 1. Hypoxia-induced DBC1 degradation is dependent on E3 Ligase SIAH2.

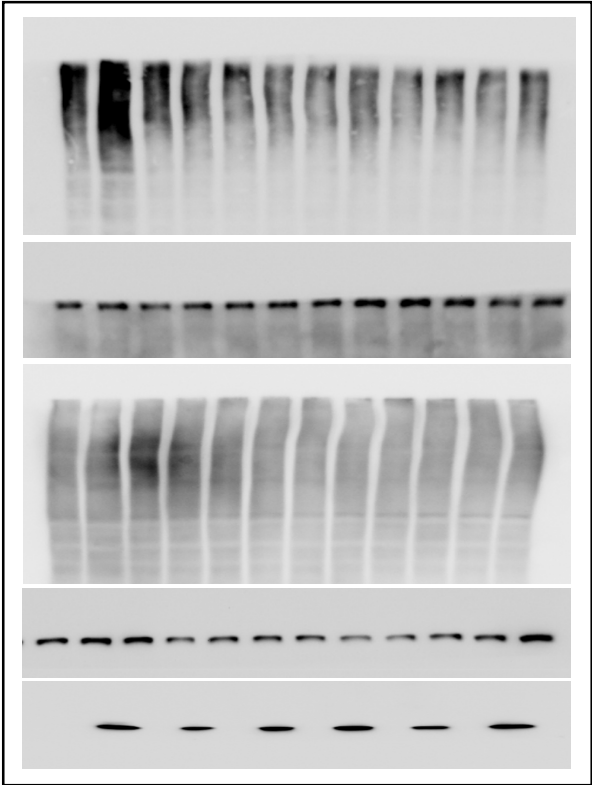

Figure S3A

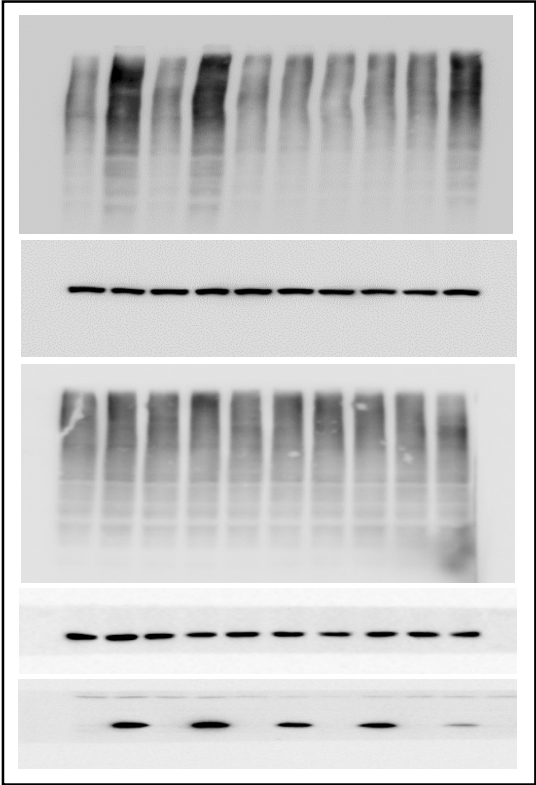

Figure S3B

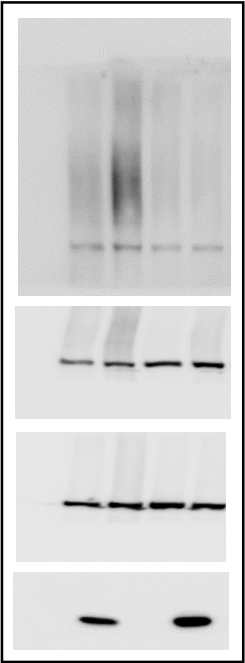

Figure S3C

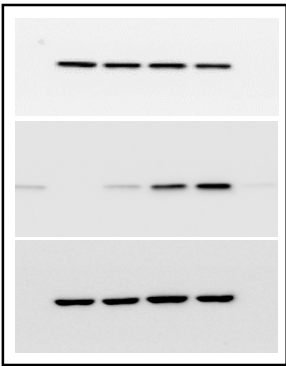

Figure S3D

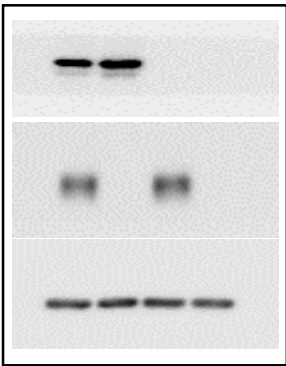

Figure S3E

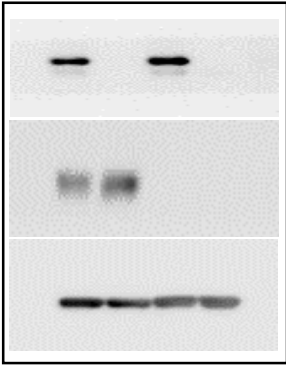

Figure S3G

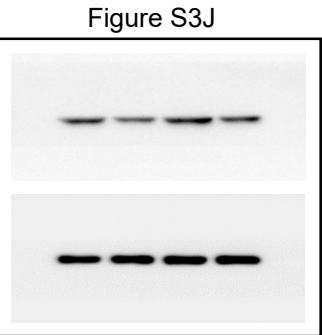

Figure S3J

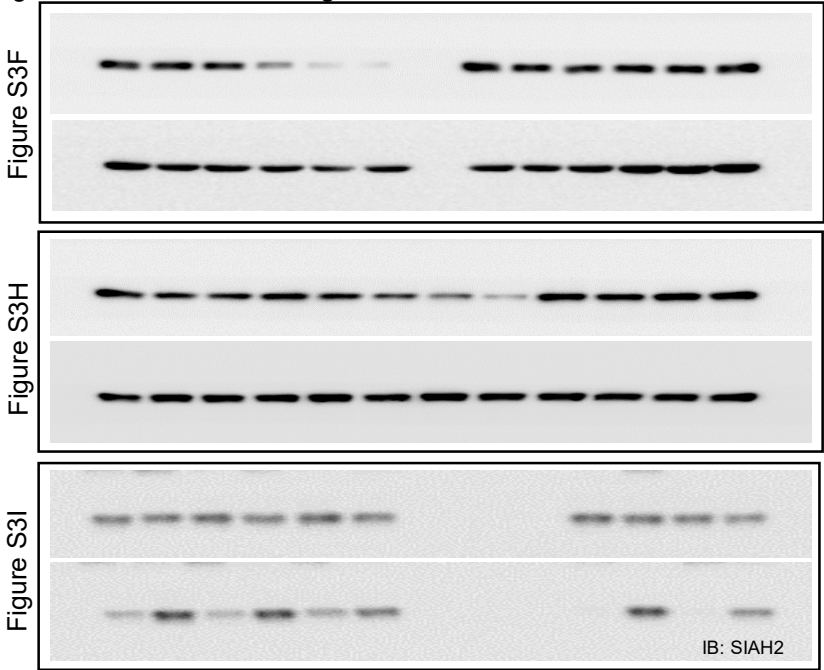

Figure S3F

Figure S3H

Figure S3I

IB: SIAH2

**Figure 3-figure supplement 1. Hypoxia-induced DBC1 degradation is dependent on E3 Ligase SIAH2.**

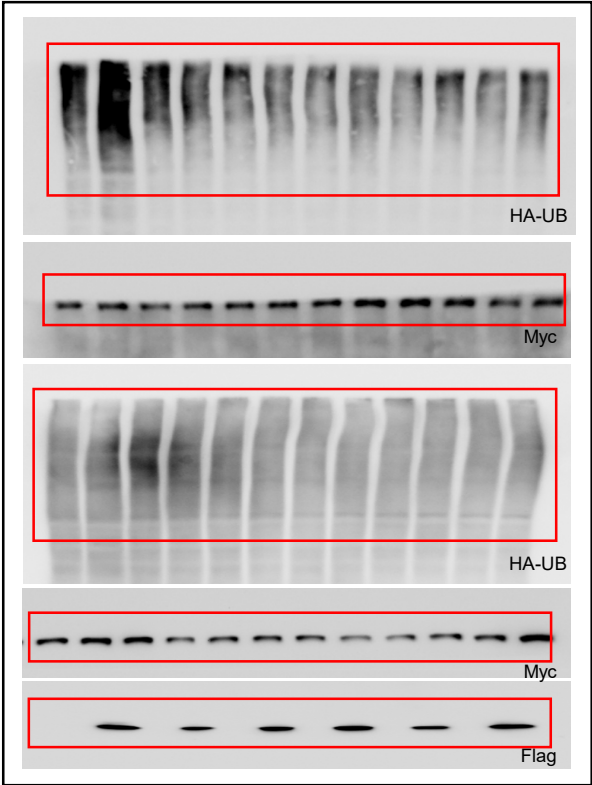

Figure S3A

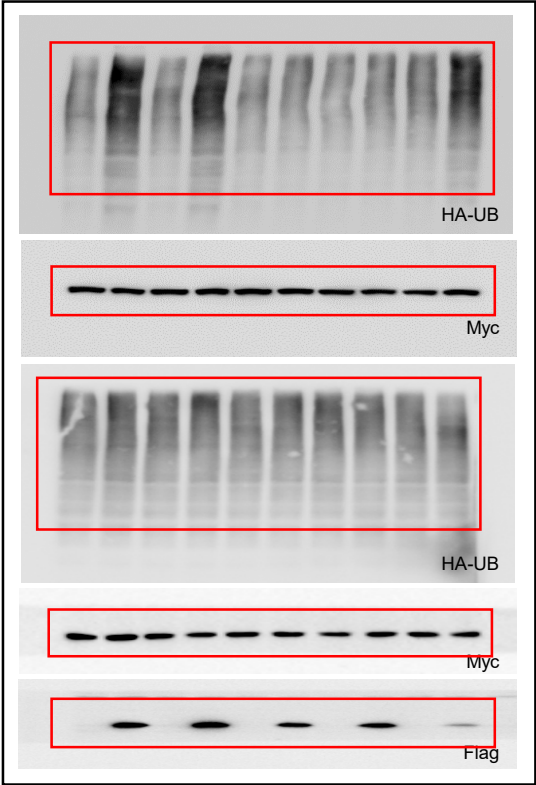

Figure S3B

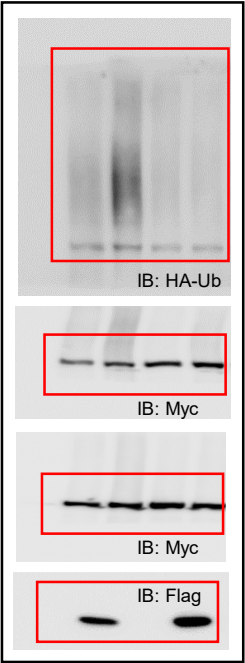

Figure S3C

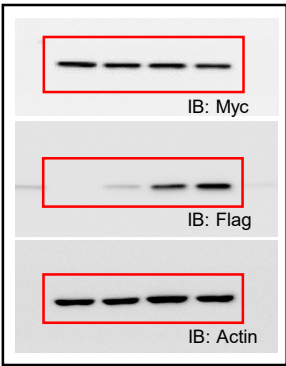

Figure S3D

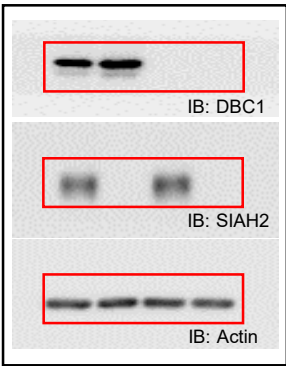

Figure S3E

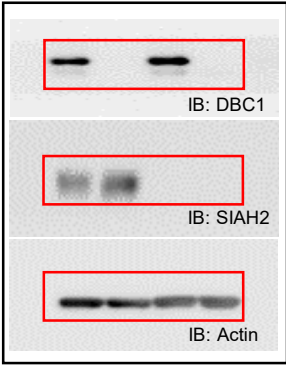

Figure S3G

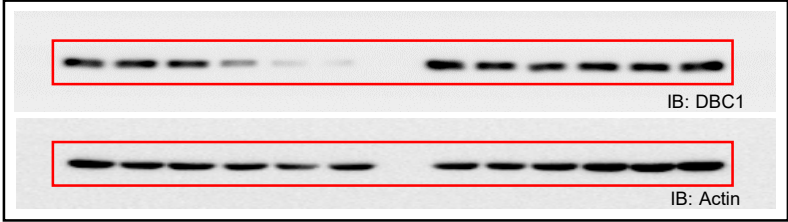

Figure S3F

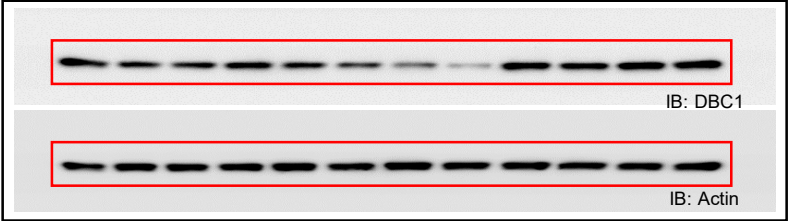

Figure S3H

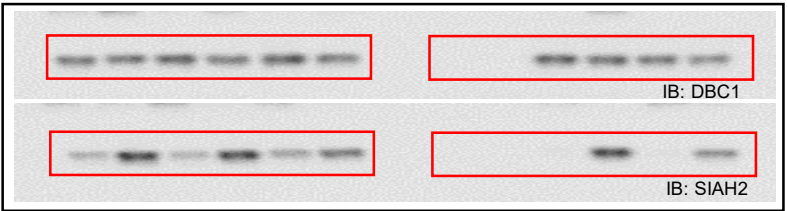

Figure S3I

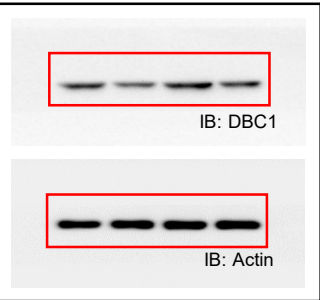

Figure S3J
