# Supplementary material for: Hypoxia-induced proteasomal degradation of DBC1 by SIAH2 in breast cancer progression
Source: eLife journal article supplement (doi:10.7554/elife.81247), 2022-08-01
Supplement: supp [file elife_poa_e81247_Figure_3_source_data_1.pdf › elife_poa_e81247_Figure_3_source_data_1.pdf]

Figure 3. the polyubiquitination and stability of DBC1 was regulated by SIAH2.

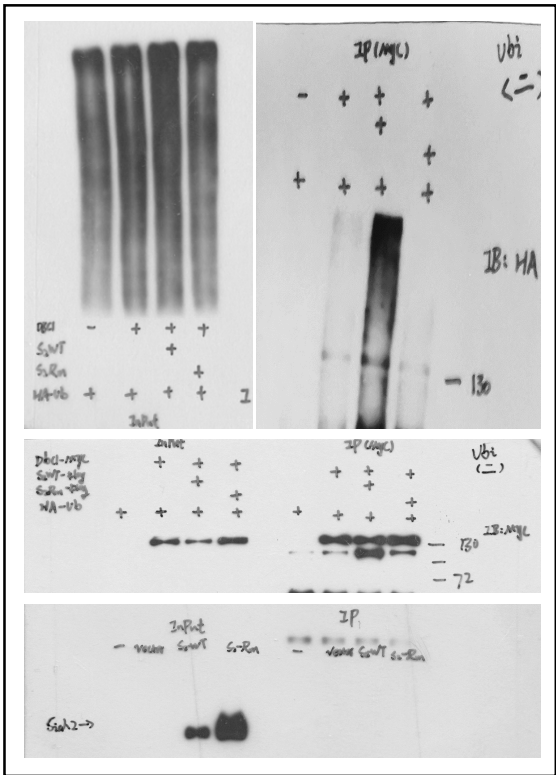

Figure 3A

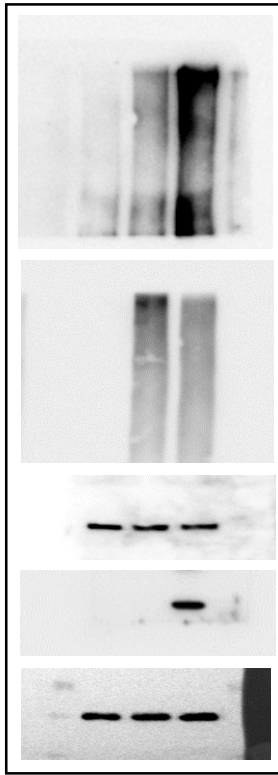

Figure 3B

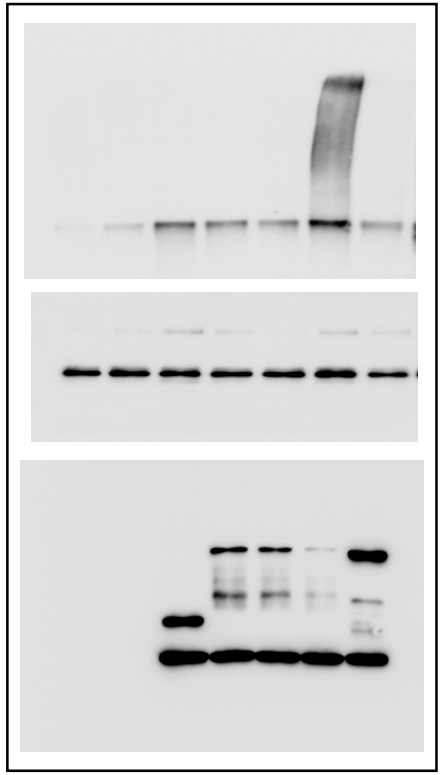

Figure 3C

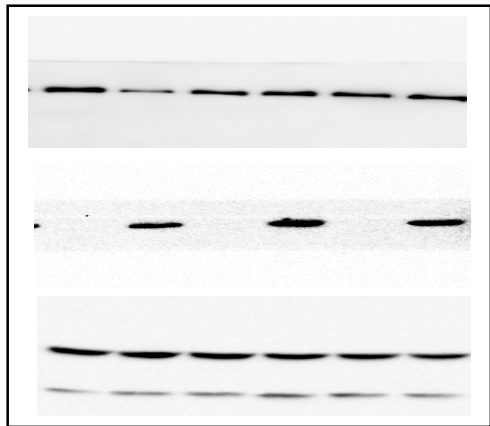

Figure 3E

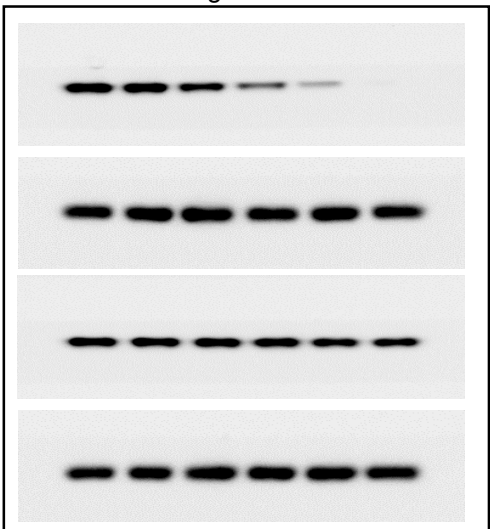

Figure 3H

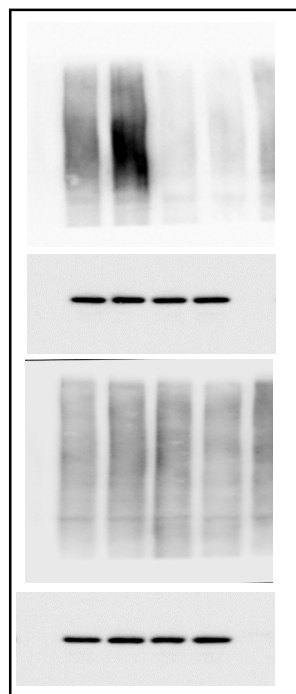

Figure 3F

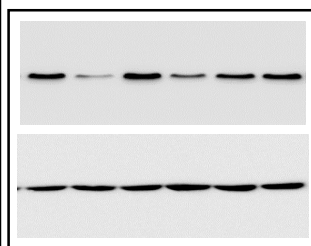

Figure 3J

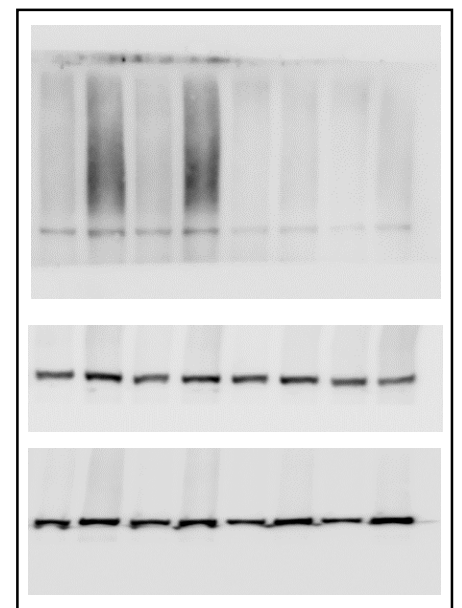

Figure 3G

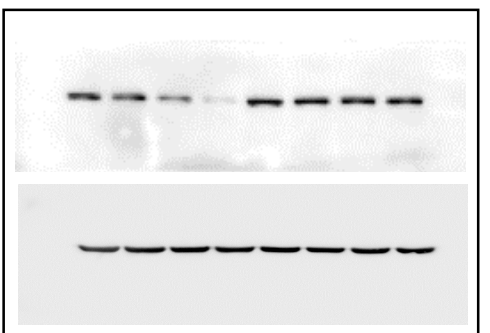

Figure 3K

Figure 3. the polyubiquitination and stability of DBC1 was regulated by SIAH2.

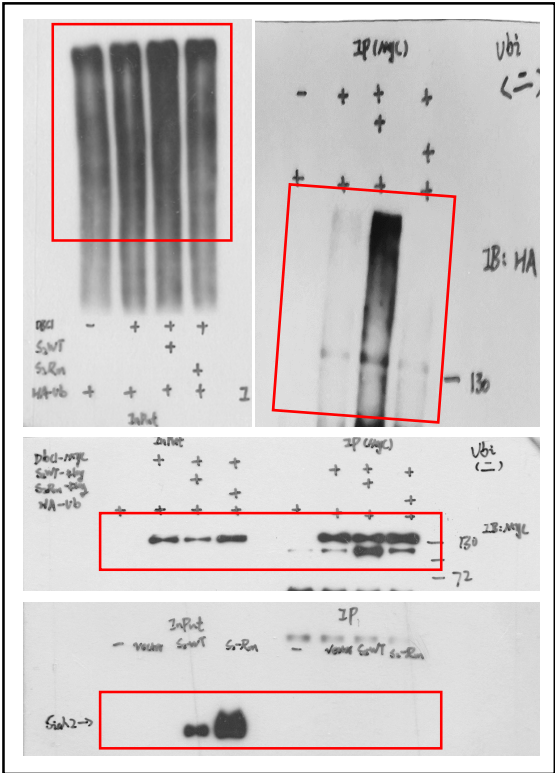

Figure 3A

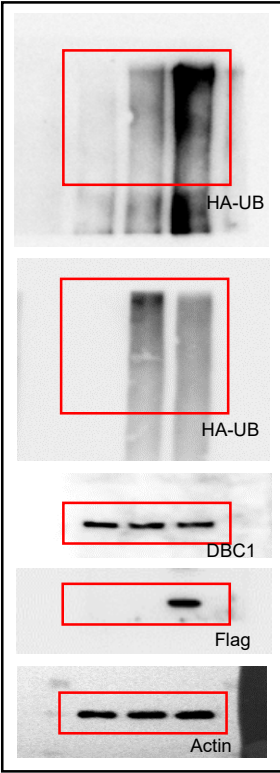

Figure 3B

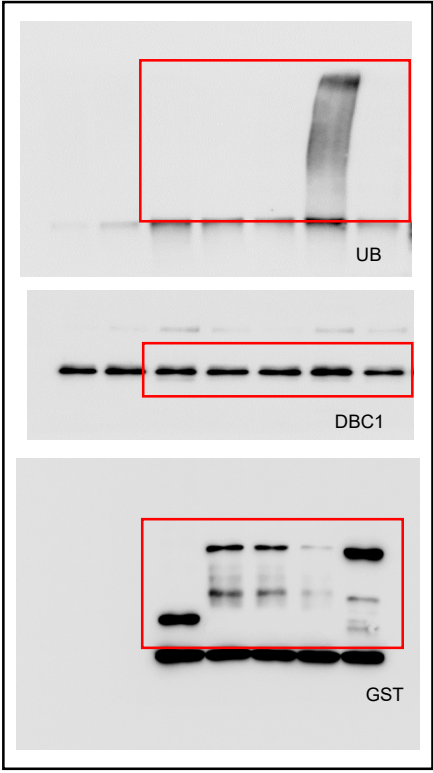

Figure 3C

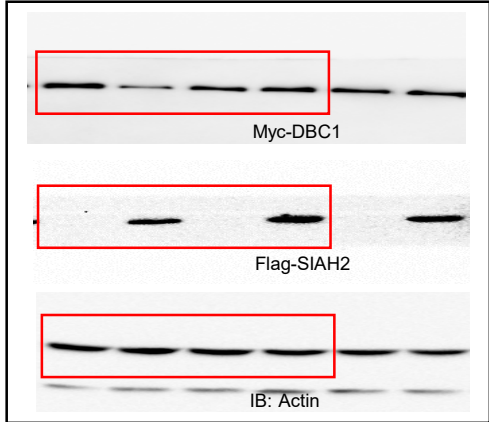

Figure 3E

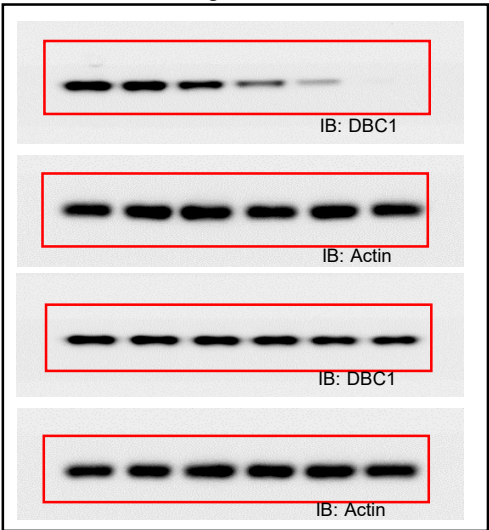

Figure 3H

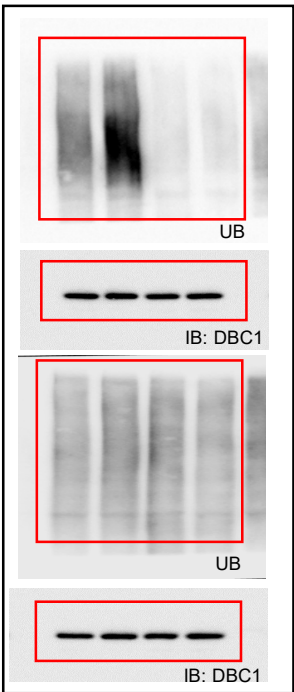

Figure 3F

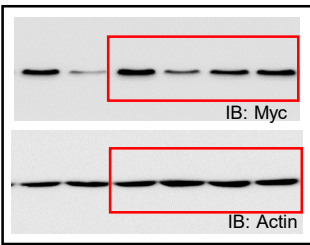

Figure 3J

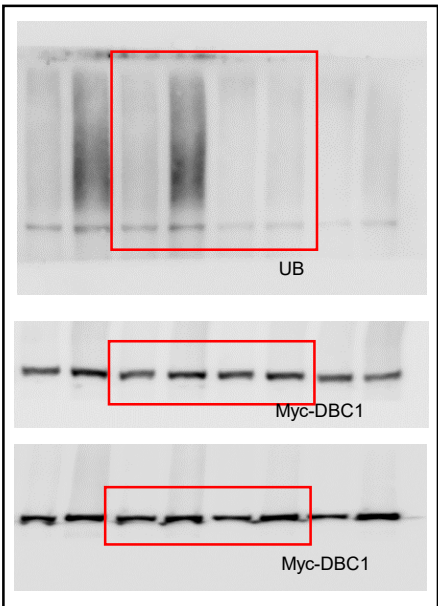

Figure 3G

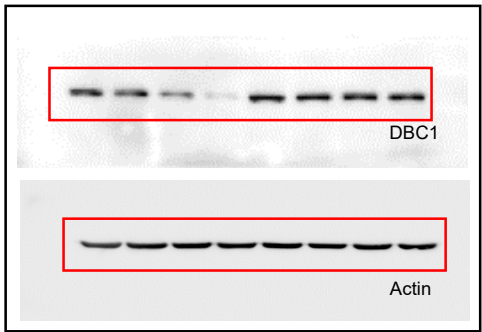

Figure 3K
