# Supplementary material for: Hypoxia-induced proteasomal degradation of DBC1 by SIAH2 in breast cancer progression
Source: eLife journal article supplement (doi:10.7554/elife.81247), 2022-08-01
Supplement: supp [file elife_poa_e81247_Figure_4_figure_supplement1_source_data_1.pdf › elife_poa_e81247_Figure_4_figure_supplement1_source_data_1.pdf]

Figure 4-figure supplement 1. The stability of DBC1 was regulated by OTUD5.

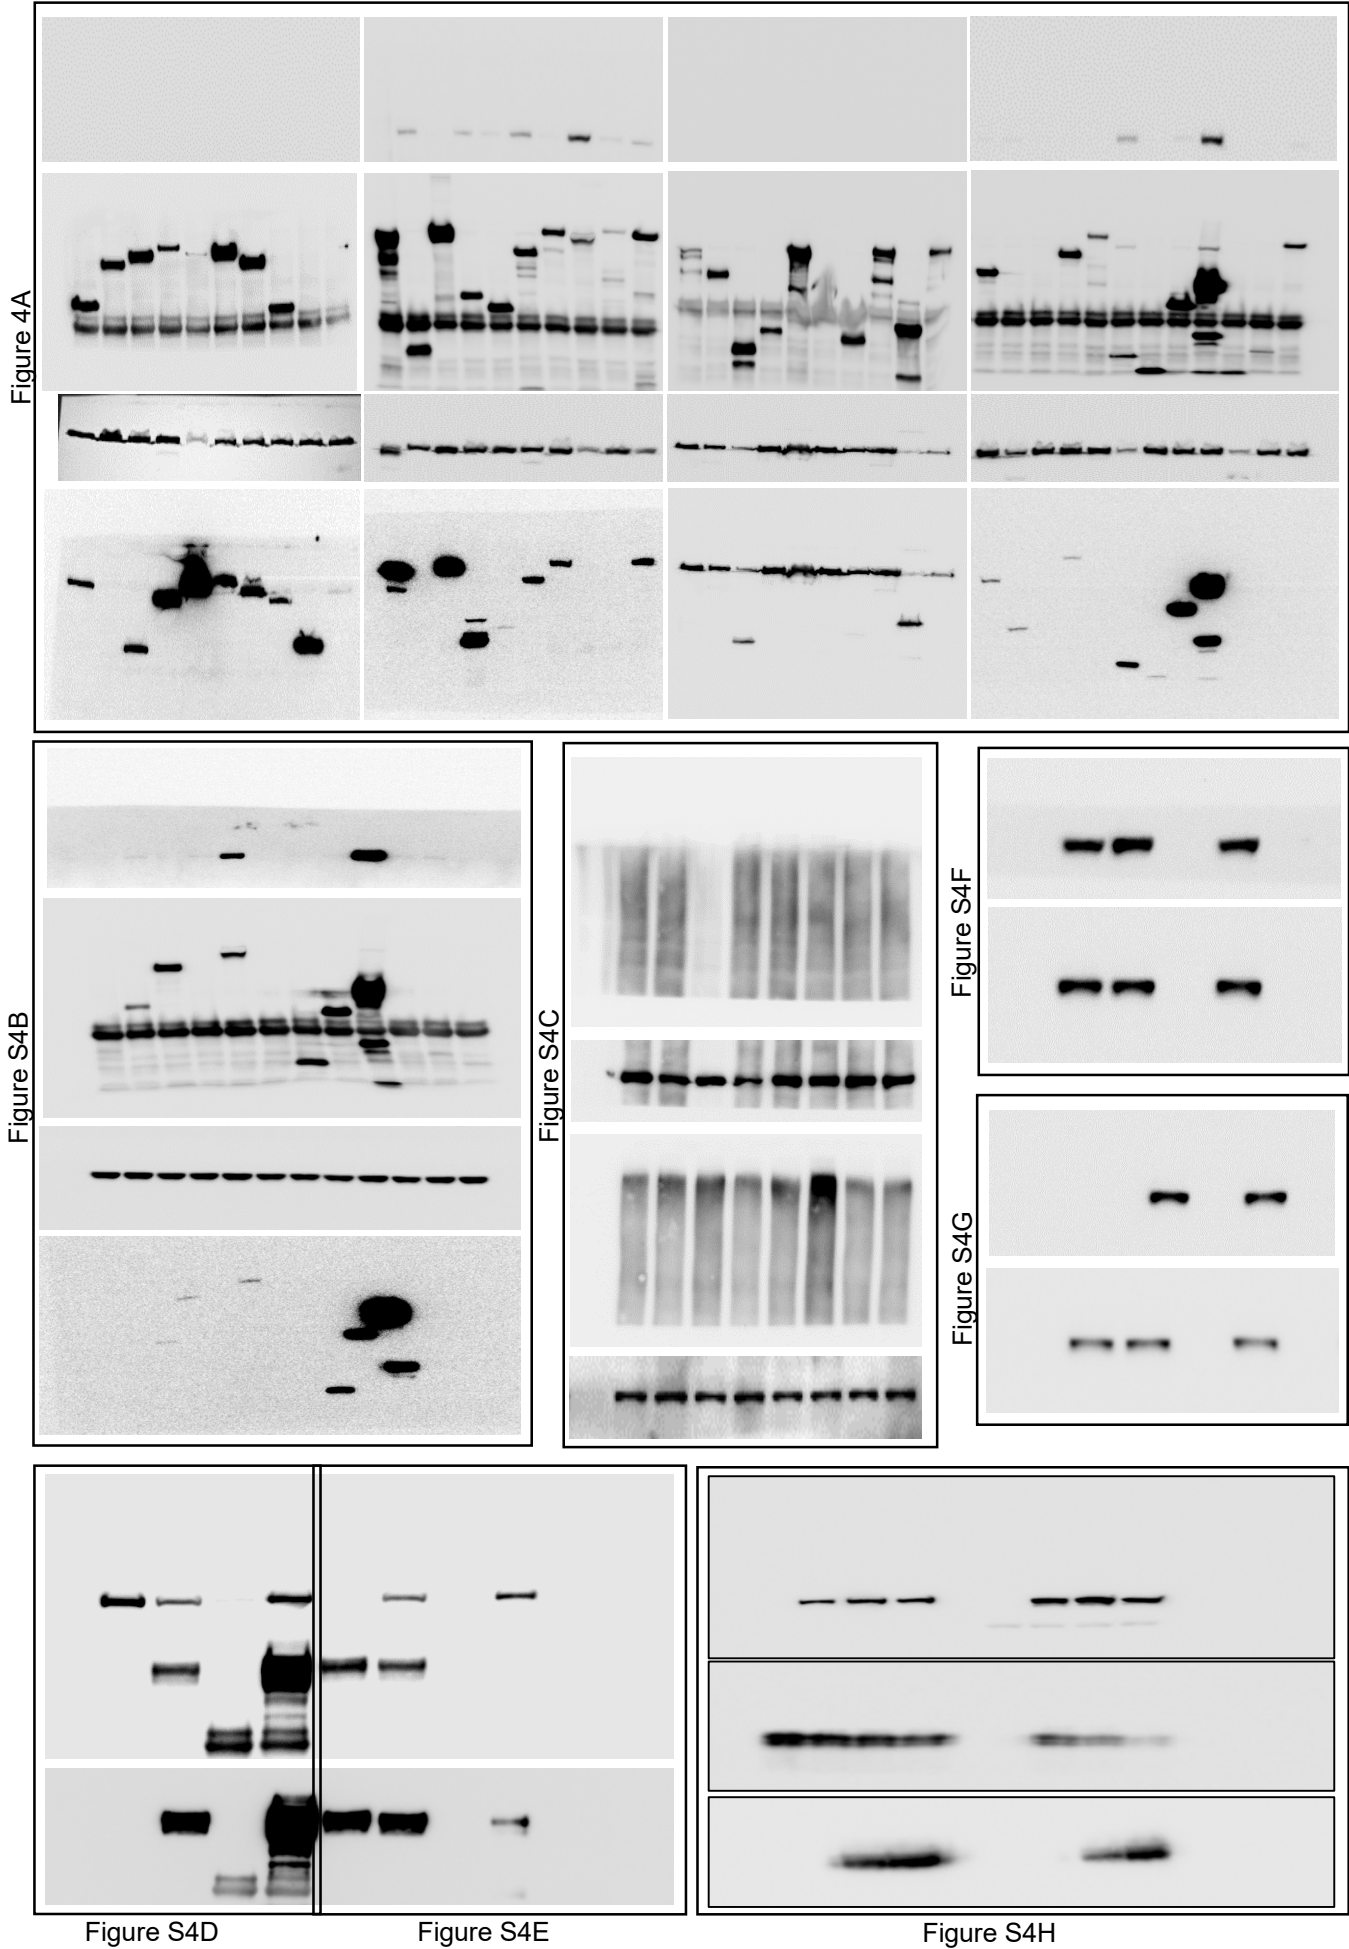

Figure 4-figure supplement 1. The stability of DBC1 was regulated by OTUD5.

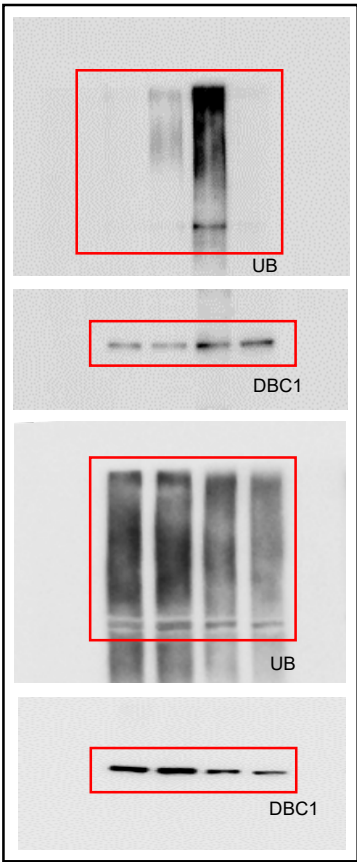

Figure 4A

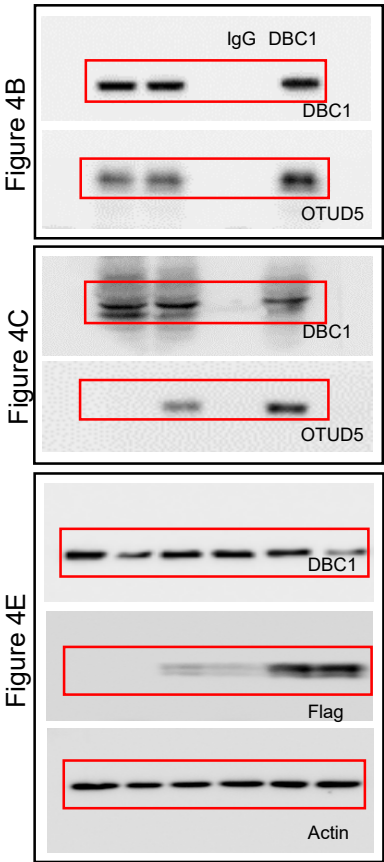

Figure 4B

Figure 4C

Figure 4E

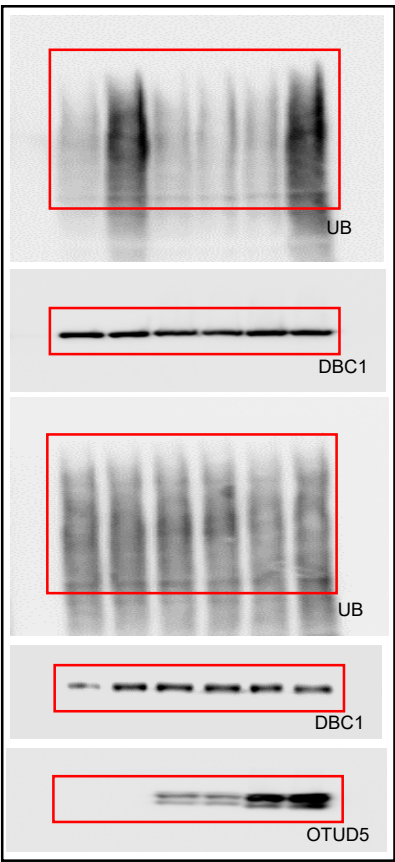

Figure 4D

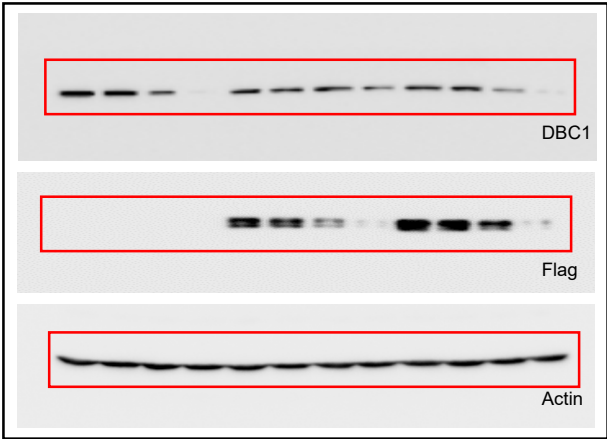

Figure 4F

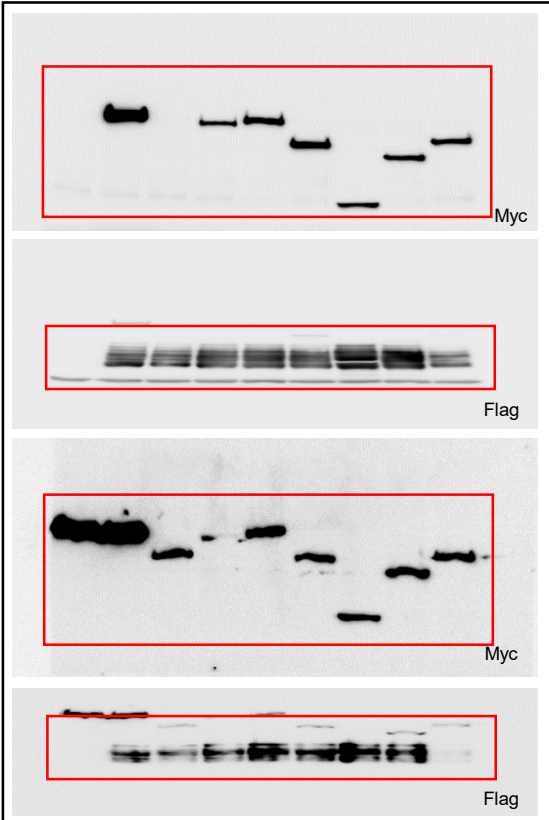

Figure 4H

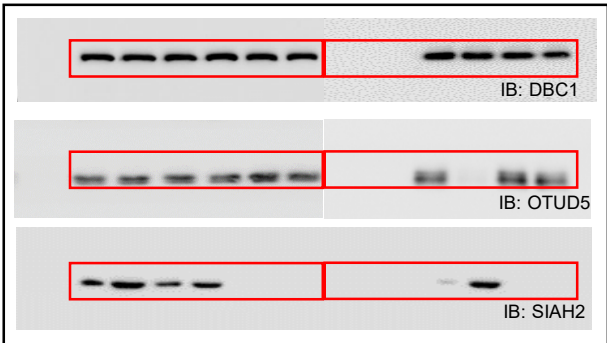

Figure 4I
