# Supplementary material for: Hypoxia-induced proteasomal degradation of DBC1 by SIAH2 in breast cancer progression
Source: eLife journal article supplement (doi:10.7554/elife.81247), 2022-08-01
Supplement: supp [file elife_poa_e81247_Figure_4_source_data_1.pdf › elife_poa_e81247_Figure_4_source_data_1.pdf]

Figure 4. OTUD5 interacts with DBC1 and regulates its stability.

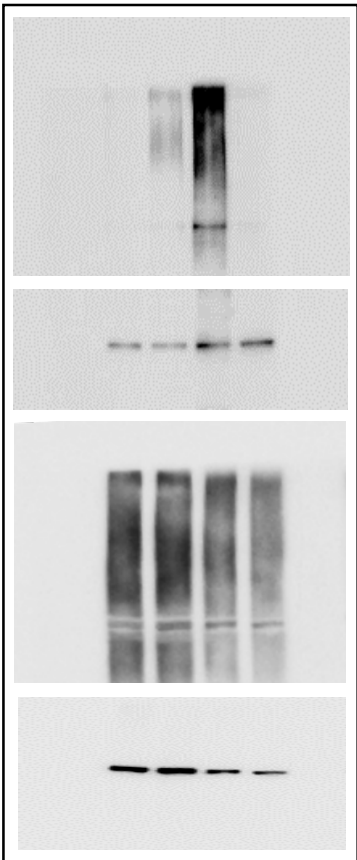

Figure 4A

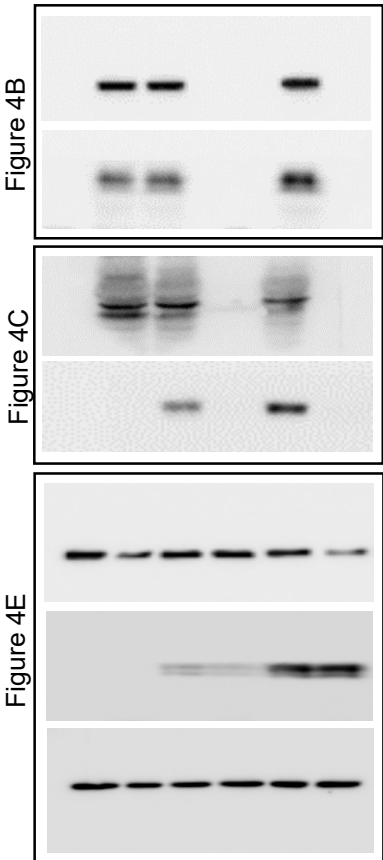

Figure 4B

Figure 4C

Figure 4E

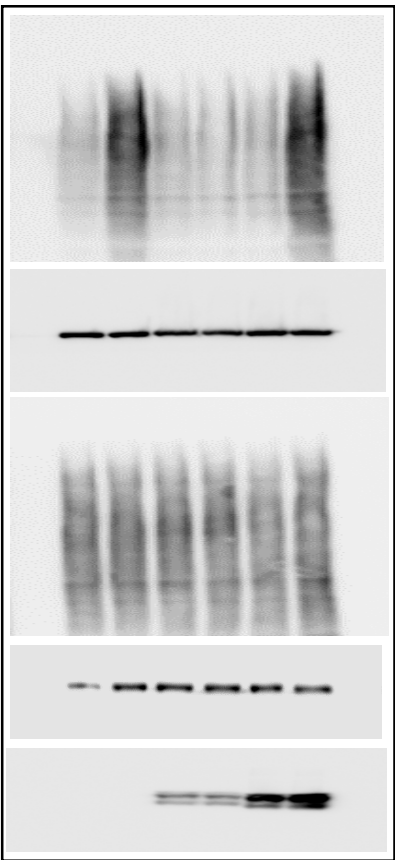

Figure 4D

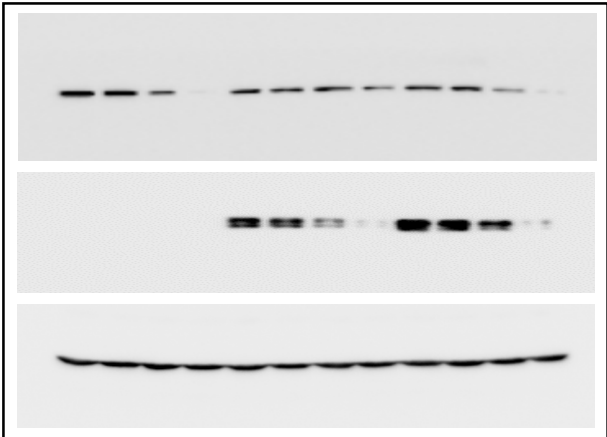

Figure 4F

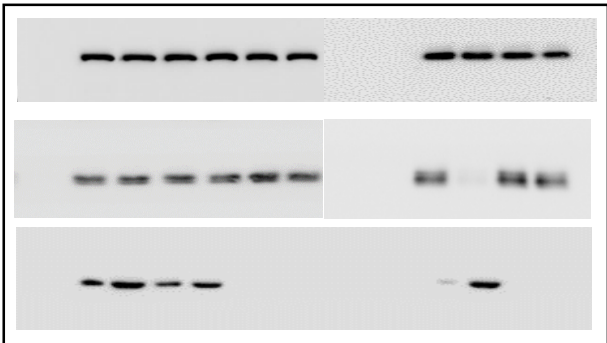

Figure 4I

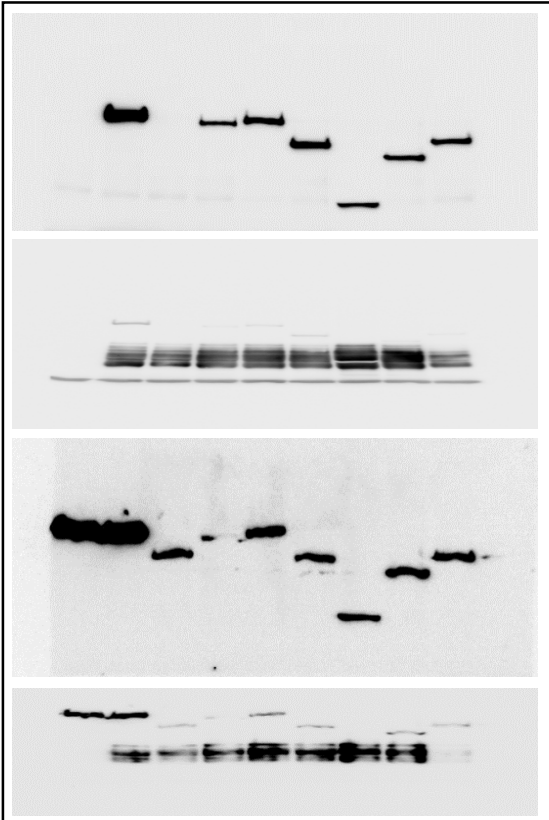

Figure 4H

Figure 4. OTUD5 interacts with DBC1 and regulates its stability.

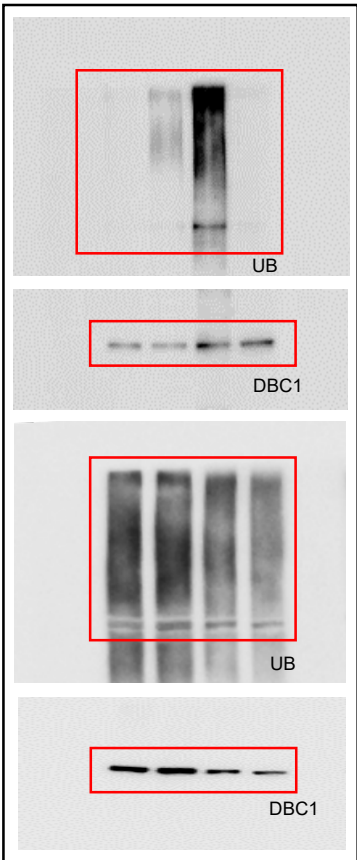

Figure 4A

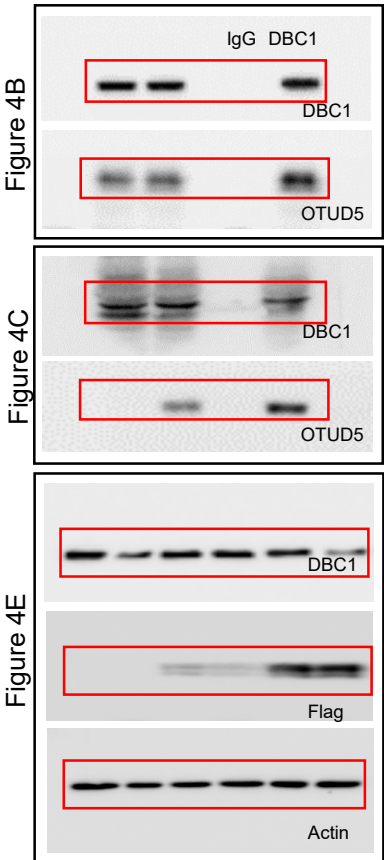

Figure 4B

Figure 4C

Figure 4E

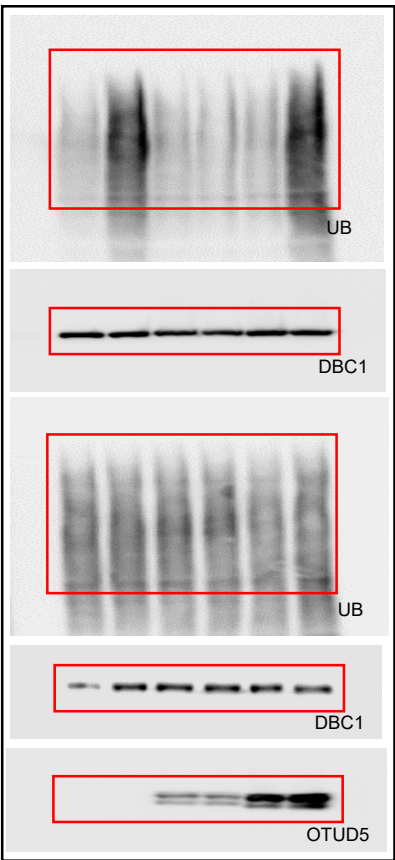

Figure 4D

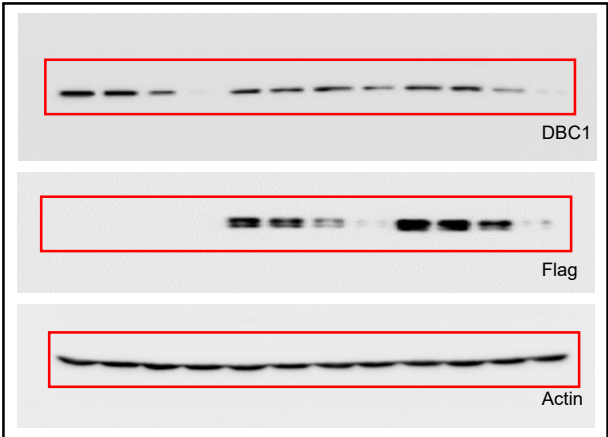

Figure 4F

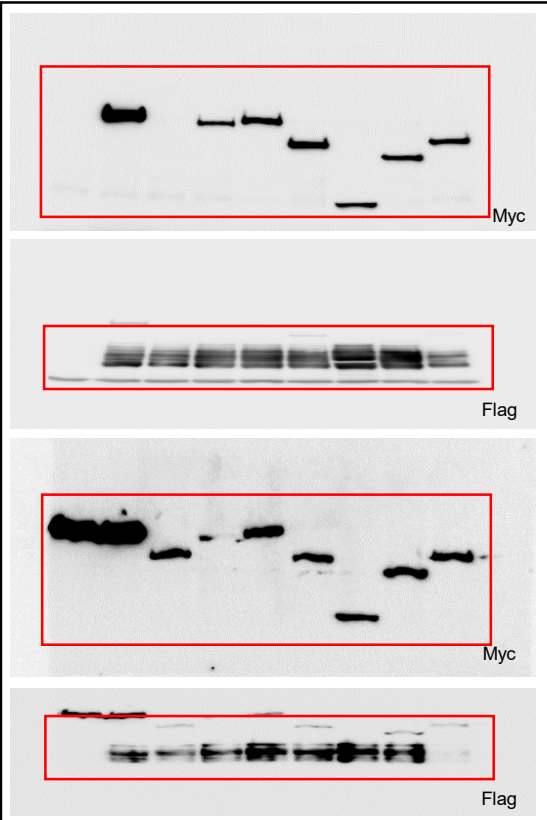

Figure 4H

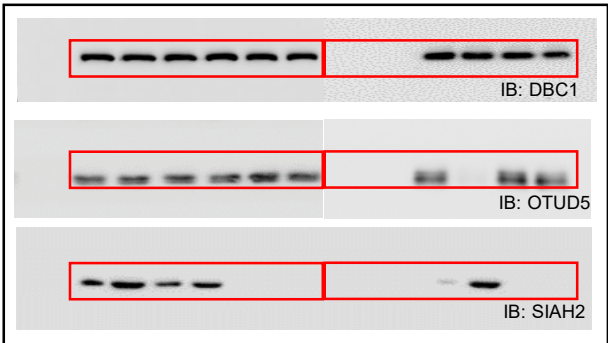

Figure 4I
