# Supplementary material for: Hypoxia-induced proteasomal degradation of DBC1 by SIAH2 in breast cancer progression
Source: eLife journal article supplement (doi:10.7554/elife.81247), 2022-08-01
Supplement: supp [file elife_poa_e81247_Figure_5_figure_supplement_1.pdf › elife_poa_e81247_Figure_5_figure_supplement_1.pdf]

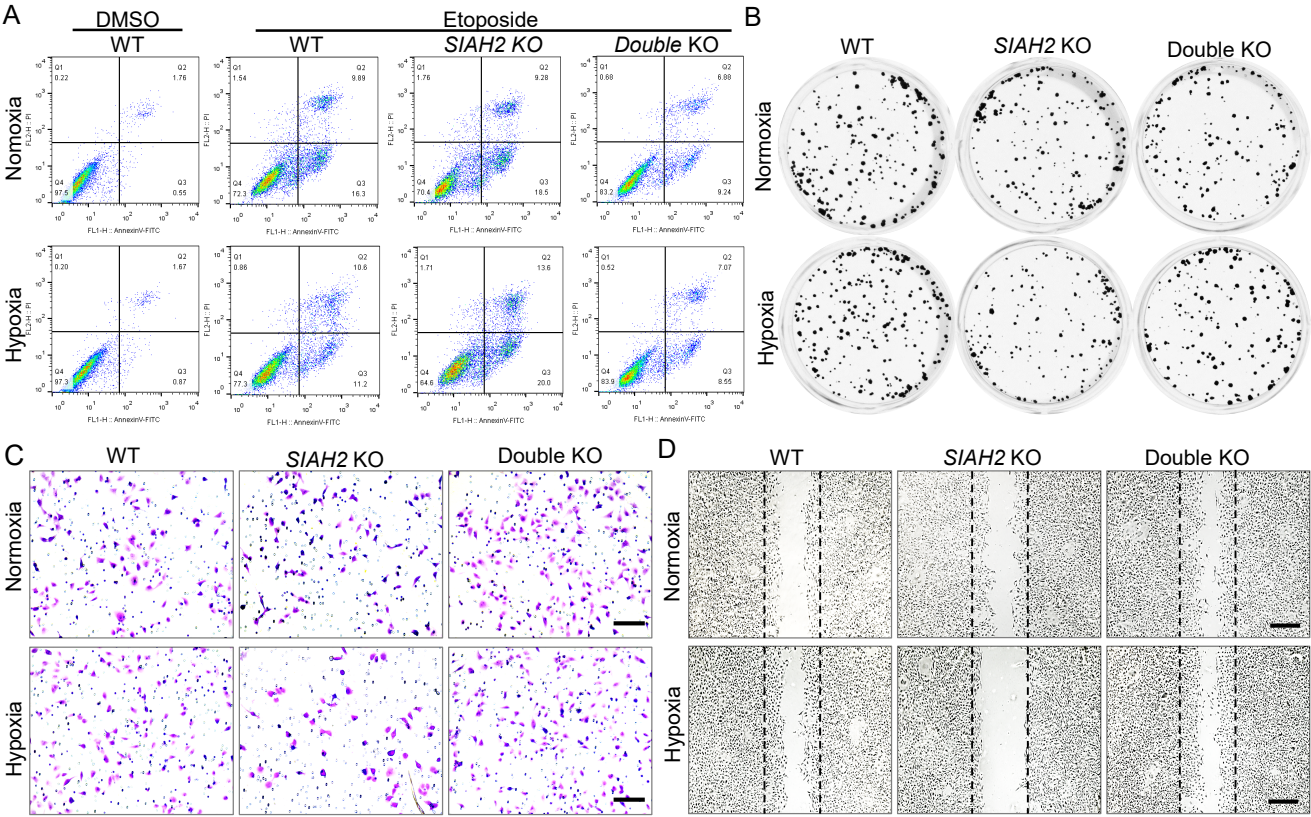

**Figure 5-figure supplement 1. Hypoxia regulates DBC1 stability to affect tumor progression.**

(A) Apoptosis assay analysis of wild-type, *SIAH2*-knockout, and *SIAH2/DBC1* double knockout MDA-MB-231 cells under normoxia or hypoxia. (B) Colony formation analysis of wild-type, *SIAH2*-knockout, and *SIAH2/DBC1* double knockout MDA-MB-231 cells under normoxia or hypoxia. (C) Transwell analysis of wild-type, *SIAH2*-knockout, and *SIAH2/DBC1* double knockout MDA-MB-231 cells under normoxia or hypoxia. (D) Scratching analysis of wild-type, *SIAH2*-knockout, and *SIAH2/DBC1* double knockout MDA-MB-231 cells under normoxia or hypoxia.
