# Supplementary material for: Hypoxia-induced proteasomal degradation of DBC1 by SIAH2 in breast cancer progression
Source: eLife journal article supplement (doi:10.7554/elife.81247), 2022-08-01

Figure 5. Hypoxia regulates tumor progression by SIAH2-DBC1 axis

Figure S5A

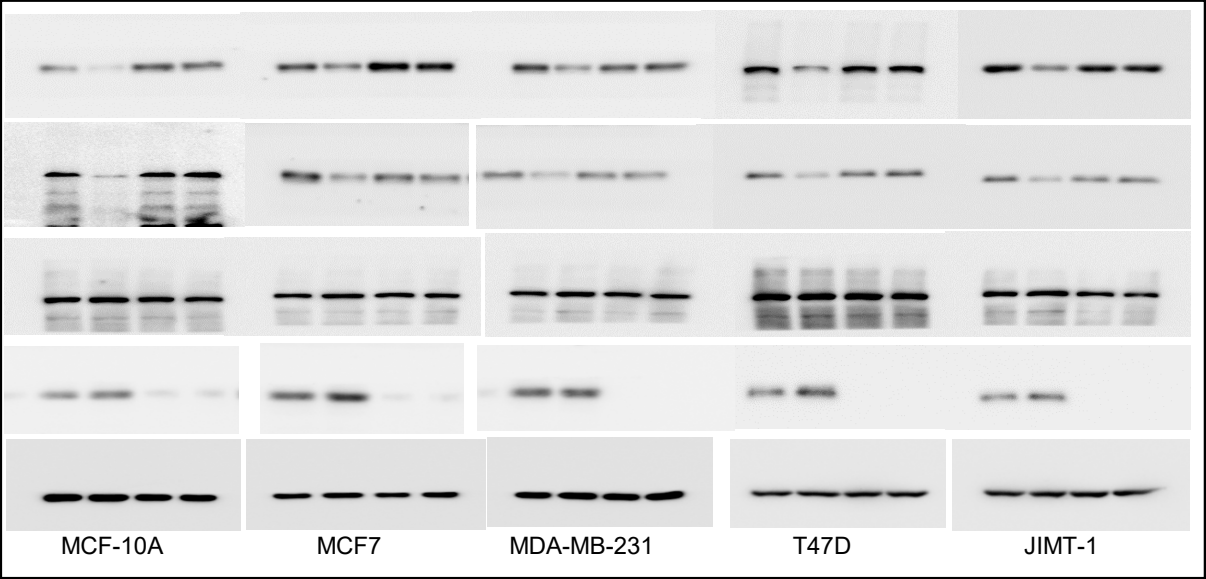

Figure 5. Hypoxia regulates tumor progression by SIAH2-DBC1 axis

Figure S5A

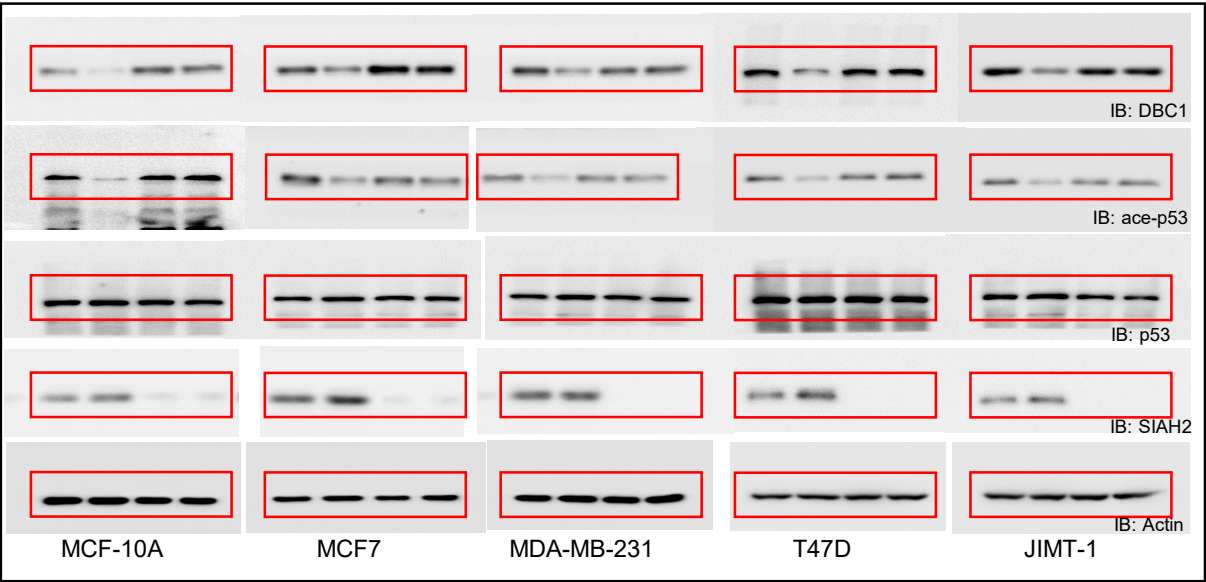

Supplement: supp [file elife_poa_e81247_Figure_5_source_data_1.pdf › elife_poa_e81247_Figure_5_source_data_1.pdf]
