# Supplementary material for: Hypoxia-induced proteasomal degradation of DBC1 by SIAH2 in breast cancer progression
Source: eLife journal article supplement (doi:10.7554/elife.81247), 2022-08-01
Supplement: supp [file elife_poa_e81247_Figure_6_figure_supplement_1.pdf › elife_poa_e81247_Figure_6_figure_supplement_1.pdf]

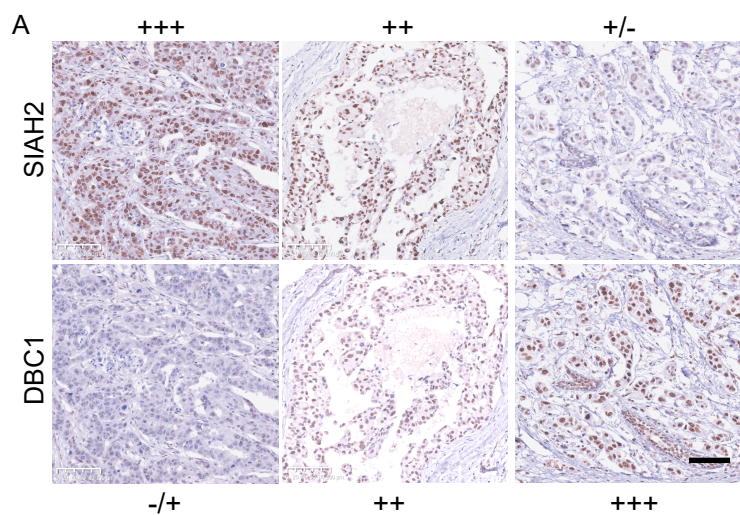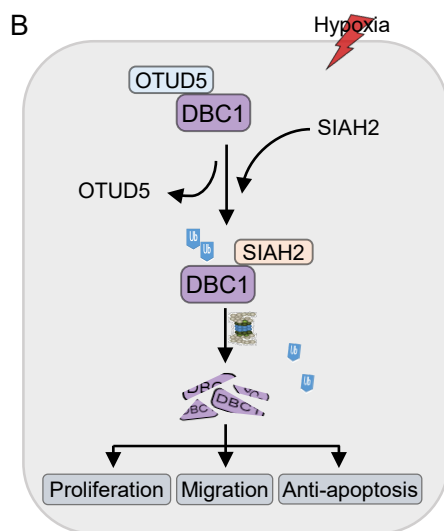

**Figure 6-figure supplement 1. The expression levels of SIAH2 and DBC1 were negative correlation in BRCA.**

(A) Expression levels of SIAH2 in breast cancer tissues were classified into three grades (negative, +, ++, or +++) according to the percentage of immunopositive cells and immunostaining intensity. scale bars, 100  $\mu$ m. (B) The proposed mechanism by which hypoxia regulates tumor progression through the SIAH2-DBC1 pathway. Under normoxic conditions, the deubiquitinase OTUD5 contacts DBC1 to form a complex. In response to hypoxia, the E3 ubiquitin ligase SIAH2 competitively binds and ubiquitinates DBC1, while OTUD5 is separated from DBC1, resulting in the degradation of DBC1 through the ubiquitin–proteasome system. In the hypoxic microenvironment of the tumor, SIAH2-mediated DBC1 degradation promotes cell migration and proliferation.
